# Supplementary material for: The recognition and electrochemiluminescence response of benzo[6]urils to polycyclic aromatic hydrocarbons
Source: Royal Society of Chemistry journal article supplement (doi:10.1039/c8nj03725f), 2018-01-01
Supplement: c8nj03725f1.pdf [file c8nj03725f1.pdf]

## Supporting Information

# Recognition and electrochemiluminescence response of benzo[6]urils to polycyclic aromatic hydrocarbons

Hai-Ling Li, Fang Wang, Qing-Mei Ge, Fei Qiu, Hang Cong\*, Zhu Tao

Key Laboratory of Macrocyclic and Supramolecular Chemistry of Guizhou Province, Guizhou University, Guiyang 550025, China. E-mail: [hcong@gzu.edu.cn](mailto:hcong@gzu.edu.cn)

|                                                                                                             |    |
|-------------------------------------------------------------------------------------------------------------|----|
| Title, authors and description of supporting information contents                                           | 1  |
| Figure S1 Fluorescence analysis of benzo[6]uril <b>1</b> on guest <b>3</b>                                  | 2  |
| Figure S2 Fluorescence analysis of benzo[6]uril <b>1</b> on guest <b>4</b>                                  | 3  |
| Figure S3 Fluorescence analysis of benzo[6]uril <b>1</b> on guest <b>5</b>                                  | 4  |
| Figure S4 Fluorescence analysis of benzo[6]uril <b>1</b> on guest <b>7</b> .....                            | 5  |
| Figure S5 Fluorescence analysis of benzo[6]uril <b>1</b> on guest <b>8</b>                                  | 6  |
| Figure S6 <sup>1</sup> H NMR spectra of the interaction of benzo[6]uril <b>1</b> with guest <b>3</b>        | 7  |
| Figure S7 <sup>1</sup> H NMR spectra of the interaction of benzo[6]uril <b>1</b> with guest <b>4</b> ....   | 8  |
| Figure S8 <sup>1</sup> H NMR spectra of the interaction of benzo[6]uril <b>1</b> with guest <b>5</b> ....   | 9  |
| Figure S9 <sup>1</sup> H NMR spectra of the interaction of benzo[6]uril <b>1</b> with guest <b>7</b> ..     | 10 |
| Figure S10 <sup>1</sup> H NMR spectra of the interaction of benzo[6]uril <b>1</b> with guest <b>8</b> ..    | 11 |
| Figure S11 Fluorescence analysis of benzo[6]uril <b>2</b> on guest <b>3</b>                                 | 12 |
| Figure S12 Fluorescence analysis of benzo[6]uril <b>2</b> on guest <b>4</b>                                 | 13 |
| Figure S13 Fluorescence analysis of benzo[6]uril <b>2</b> on guest <b>5</b>                                 | 14 |
| Figure S14 Fluorescence analysis of benzo[6]uril <b>2</b> on guest <b>7</b>                                 | 15 |
| Figure S15 Fluorescence analysis of benzo[6]uril <b>2</b> on guest <b>8</b>                                 | 16 |
| Figure S16 <sup>1</sup> H NMR spectra of the interaction of benzo[6]uril <b>2</b> with guest <b>3</b> ..... | 17 |
| Figure S17 <sup>1</sup> H NMR spectra of the interaction of benzo[6]uril <b>2</b> with guest <b>4</b> ..    | 18 |
| Figure S18 <sup>1</sup> H NMR spectra of the interaction of benzo[6]uril <b>2</b> with guest <b>5</b> ..    | 19 |
| Figure S19 <sup>1</sup> H NMR spectra of the interaction of benzo[6]uril <b>2</b> with guest <b>7</b> ..    | 20 |
| Figure S20 <sup>1</sup> H NMR spectra of the interaction of benzo[6]uril <b>2</b> with guest <b>8</b> ..    | 21 |
| Figure S21 Electrochemiluminescence analysis of blank test of benzo[6]uril <b>1</b> .....                   | 22 |
| Figure S22 Electrochemiluminescence analysis of benzo[6]uril <b>1</b> on guests....                         | 23 |
| Coordinates of the optimized structures                                                                     | 24 |

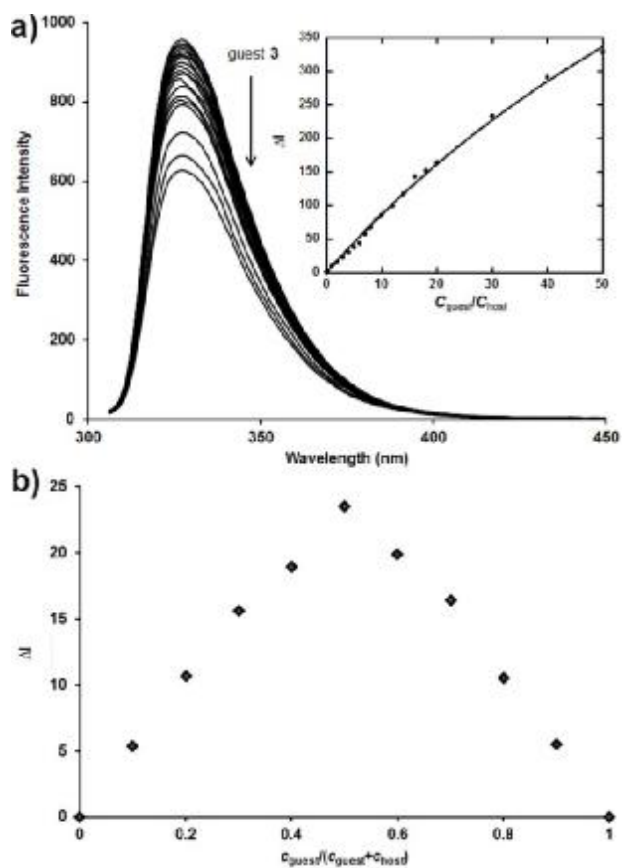

**Figure S1.** a) Fluorescence titration spectra of benzo[6]uril **1** with guest **3**. The host concentration was fixed at  $1.0 \times 10^{-5} \text{ mol} \cdot \text{L}^{-1}$  in  $\text{CH}_2\text{Cl}_2/\text{CH}_3\text{OH}$  (5:1, v/v). Inset: nonlinear fitting of the changes in fluorescence intensity upon addition of the guest ( $\lambda_{\text{em}} = 327 \text{ nm}$ ,  $\lambda_{\text{ex}} = 304 \text{ nm}$ ). b) Job's plots of the interaction between benzo[6]uril **1** and a) guest **3**. The total concentration was maintained at  $1.0 \times 10^{-5} \text{ mol} \cdot \text{L}^{-1}$ , and fluorescence intensities were recorded at  $\lambda_{\text{em}} = 327 \text{ nm}$ ,  $\lambda_{\text{ex}} = 304 \text{ nm}$ .

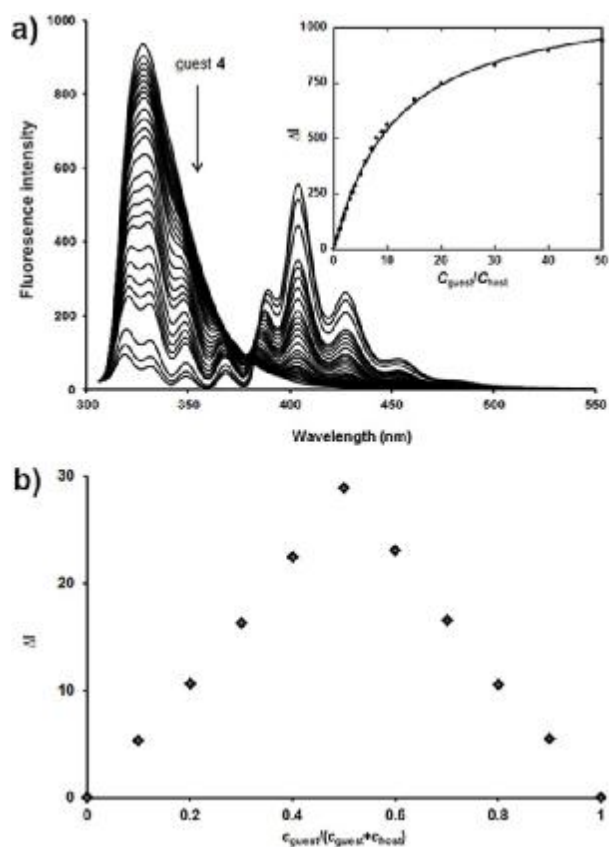

**Figure S2.** a) Fluorescence titration spectra of benzo[6]uril **1** with guest **4**. The host concentration was fixed at  $1.0 \times 10^{-5} \text{ mol} \cdot \text{L}^{-1}$  in  $\text{CH}_2\text{Cl}_2/\text{CH}_3\text{OH}$  (5:1, v/v). Inset: nonlinear fitting of the changes in fluorescence intensity upon addition of the guest ( $\lambda_{\text{em}} = 327 \text{ nm}$ ,  $\lambda_{\text{ex}} = 304 \text{ nm}$ ). b) Job's plots of the interaction between benzo[6]uril **1** and a) guest **4**. The total concentration was maintained at  $1.0 \times 10^{-5} \text{ mol} \cdot \text{L}^{-1}$ , and fluorescence intensities were recorded at  $\lambda_{\text{em}} = 327 \text{ nm}$ ,  $\lambda_{\text{ex}} = 304 \text{ nm}$ .

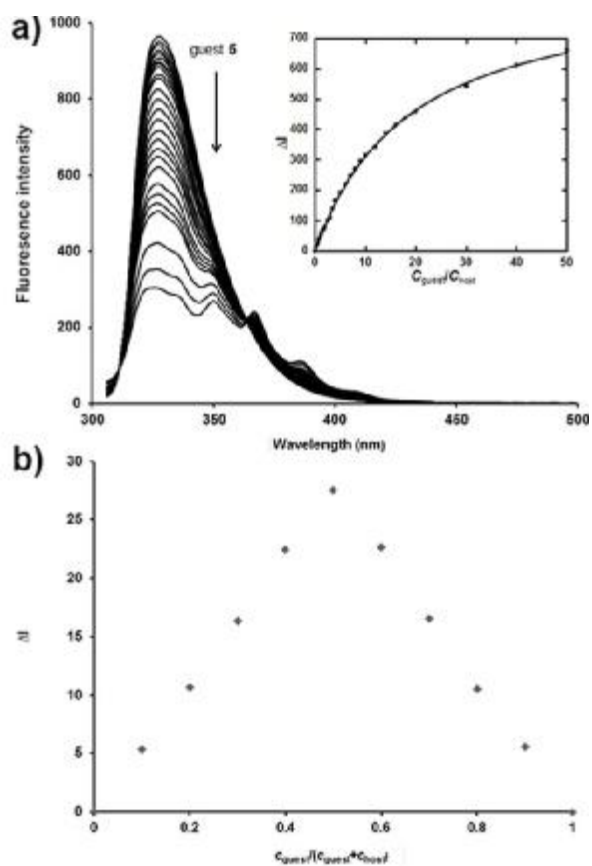

**Figure S3.** a) Fluorescence titration spectra of benzo[6]uril **1** with guest **5**. The host concentration was fixed at  $1.0 \times 10^{-5} \text{ mol} \cdot \text{L}^{-1}$  in  $\text{CH}_2\text{Cl}_2/\text{CH}_3\text{OH}$  (5:1, v/v). Inset: nonlinear fitting of the changes in fluorescence intensity upon addition of the guest ( $\lambda_{\text{em}} = 327 \text{ nm}$ ,  $\lambda_{\text{ex}} = 304 \text{ nm}$ ). b) Job's plots of the interaction between benzo[6]uril **1** and a) guest **5**. The total concentration was maintained at  $1.0 \times 10^{-5} \text{ mol} \cdot \text{L}^{-1}$ , and fluorescence intensities were recorded at  $\lambda_{\text{em}} = 327 \text{ nm}$ ,  $\lambda_{\text{ex}} = 304 \text{ nm}$ .

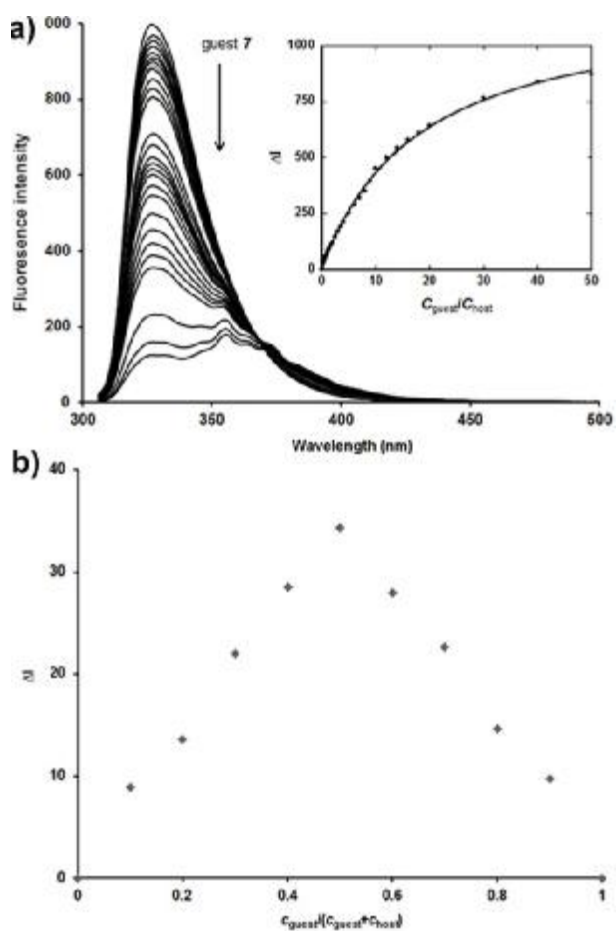

**Figure S4.** a) Fluorescence titration spectra of benzo[6]uril **1** with guest **7**. The host concentration was fixed at  $1.0 \times 10^{-5} \text{ mol} \cdot \text{L}^{-1}$  in  $\text{CH}_2\text{Cl}_2/\text{CH}_3\text{OH}$  (5:1, v/v). Inset: nonlinear fitting of the changes in fluorescence intensity upon addition of the guest ( $\lambda_{\text{em}} = 327 \text{ nm}$ ,  $\lambda_{\text{ex}} = 304 \text{ nm}$ ). b) Job's plots of the interaction between benzo[6]uril **1** and a) guest **7**. The total concentration was maintained at  $1.0 \times 10^{-5} \text{ mol} \cdot \text{L}^{-1}$ , and fluorescence intensities were recorded at  $\lambda_{\text{em}} = 327 \text{ nm}$ ,  $\lambda_{\text{ex}} = 304 \text{ nm}$ .

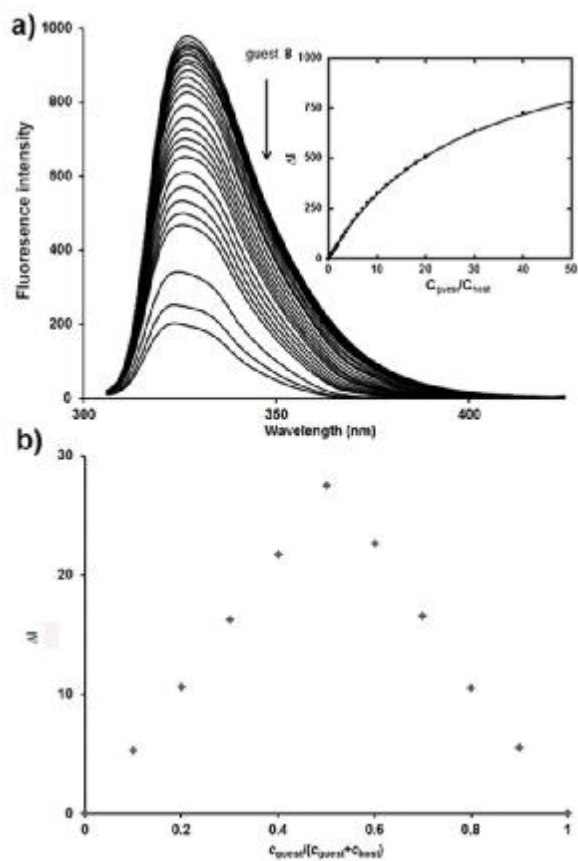

**Figure S5.** a) Fluorescence titration spectra of benzo[6]uril **1** with guest **8**. The host concentration was fixed at  $1.0 \times 10^{-5} \text{ mol} \cdot \text{L}^{-1}$  in  $\text{CH}_2\text{Cl}_2/\text{CH}_3\text{OH}$  (5:1, v/v). Inset: nonlinear fitting of the changes in fluorescence intensity upon addition of the guest ( $\lambda_{\text{em}} = 327 \text{ nm}$ ,  $\lambda_{\text{ex}} = 304 \text{ nm}$ ). b) Job's plots of the interaction between benzo[6]uril **1** and a) guest **8**. The total concentration was maintained at  $1.0 \times 10^{-5} \text{ mol} \cdot \text{L}^{-1}$ , and fluorescence intensities were recorded at  $\lambda_{\text{em}} = 327 \text{ nm}$ ,  $\lambda_{\text{ex}} = 304 \text{ nm}$ .

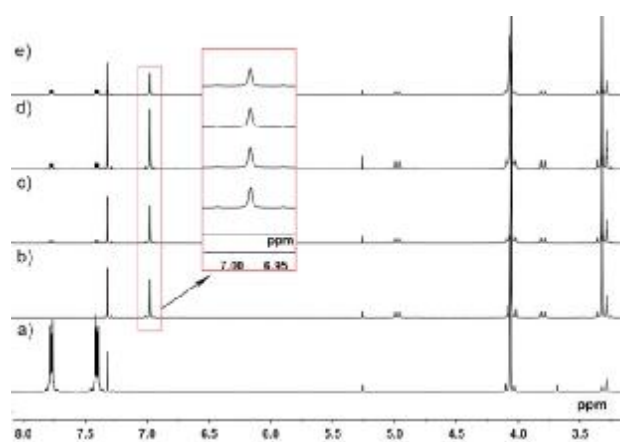

**Figure S6.** <sup>1</sup>H NMR spectra (400 MHz, CD<sub>3</sub>Cl/CD<sub>3</sub>OD, 5:1,v/v ) of (a) free guest **3**; (b) free benzo[6]uril **1** ( $2.0 \times 10^{-3} \text{ mol} \cdot \text{L}^{-1}$ ), and in the presence of (c) 0.5 equiv ; (d) 1 equiv ; (e) 2 equiv of guest **3**.

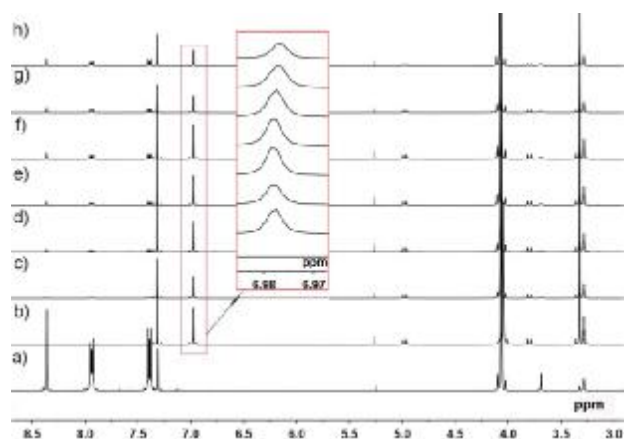

**Figure S7.**  $^1\text{H}$  NMR spectra (400 MHz,  $\text{CH}_2\text{Cl}_2/\text{CH}_3\text{OH}$ , 5:1, v/v ) of (b) free benzo[6]juril **1** ( $2.0 \times 10^{-3} \text{ mol} \cdot \text{L}^{-1}$ ), and in the presence of (c) 0.25 equiv ; (d) 0.5 equiv ; (e) 0.75 equiv ; (f) 1 equiv ; (g) 1.5 equiv ; (h) 2 equiv of guest **4**, and (a) free guest **4**.



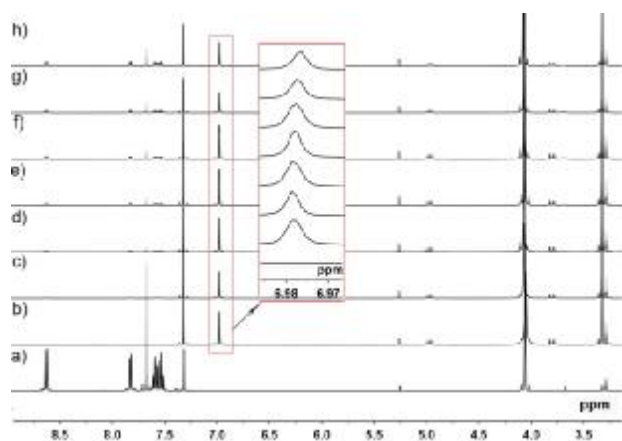

**Figure S8.**  $^1\text{H}$  NMR spectra (400 MHz,  $\text{CH}_2\text{Cl}_2/\text{CH}_3\text{OH}$ , 5:1,v/v ) of (b) free benzo[6]juril **1** ( $2.0 \times 10^{-3} \text{ mol}\cdot\text{L}^{-1}$ ), and in the presence of (c) 0.25 equiv ; (d) 0.5 equiv ; (e) 0.75 equiv ; (f) 1 equiv ; (g) 1.5 equiv ; (h) 2 equiv of guest **5**, and (a) free guest **5**.

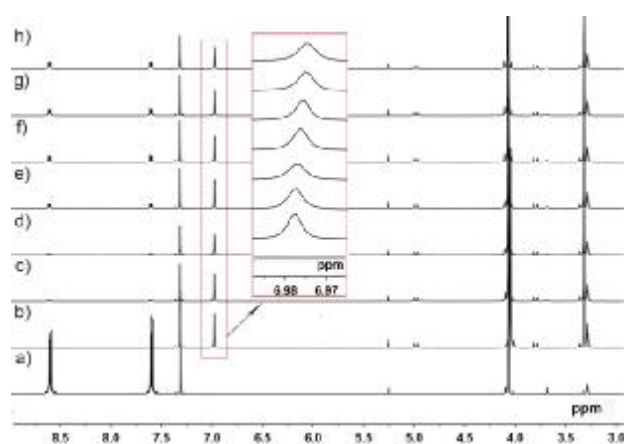

**Figure S9.**  $^1\text{H}$  NMR spectra (400 MHz,  $\text{CH}_2\text{Cl}_2/\text{CH}_3\text{OH}$ , 5:1,v/v ) of (b) free benzo[6]juril **1** ( $2.0 \times 10^{-3} \text{ mol}\cdot\text{L}^{-1}$ ), and in the presence of (c) 0.25 equiv ; (d) 0.5 equiv ; (e) 0.75 equiv ; (f) 1 equiv ; (g) 2 equiv ; (h) 3 equiv of guest **7**, and (a) free guest **7**.

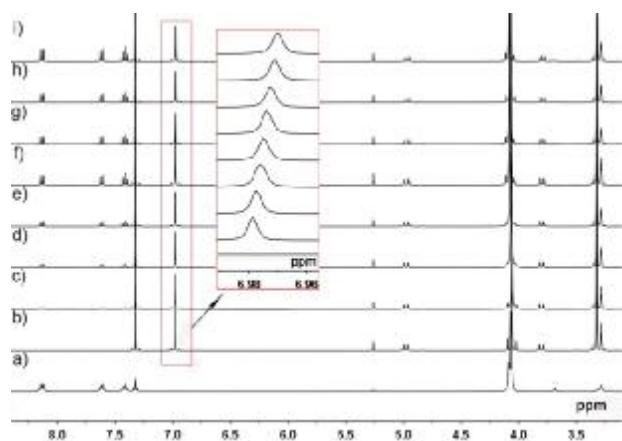

**Figure S10.**  $^1\text{H}$  NMR spectra (400 MHz,  $\text{CH}_2\text{Cl}_2/\text{CH}_3\text{OH}$ , 5:1, v/v ) of (b) free benzo[6]juril **1** ( $2.0 \times 10^{-3} \text{ mol} \cdot \text{L}^{-1}$ ), and in the presence of (c) 0.25 equiv ; (d) 0.5 equiv ; (e) 0.75 equiv ; (f) 1 equiv ; (g) 1.5 equiv ; (h) 2 equiv of guest **8**, and (a) free guest **8**.

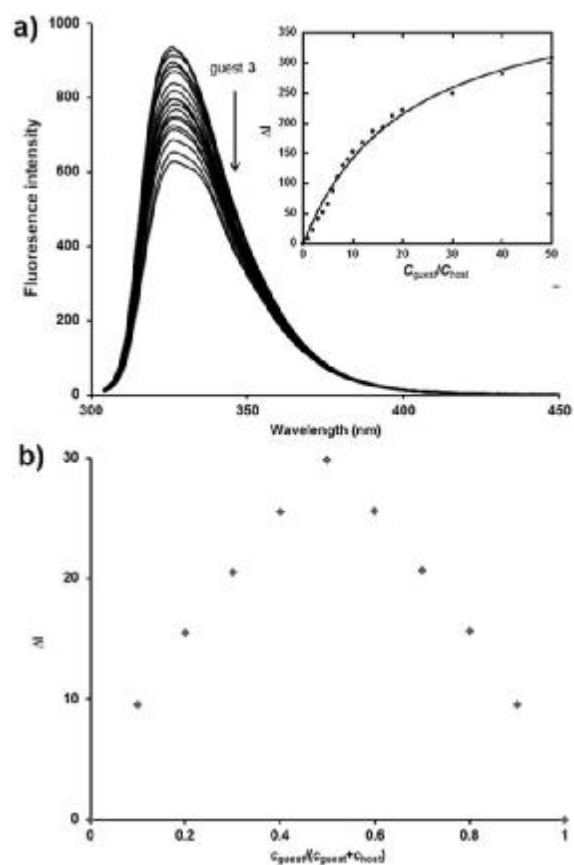

**Figure S11.** Fluorescence titration spectra of benzo[6]juril **2** with guest **3**. **a)** The host concentration was fixed at  $1.0 \times 10^{-5} \text{ mol}\cdot\text{L}^{-1}$  in DMSO. Inset: nonlinear fitting of the changes in fluorescence intensity upon addition of the guest ( $\lambda_{\text{em}} = 326 \text{ nm}$ ,  $\lambda_{\text{ex}} = 300 \text{ nm}$ ). **b)** Job's plots of the interaction between benzo[6]juril **2** and a) guest **3**. The total concentration was maintained at  $1.0 \times 10^{-5} \text{ mol}\cdot\text{L}^{-1}$ , and fluorescence intensities were recorded at  $\lambda_{\text{em}} = 326 \text{ nm}$ ,  $\lambda_{\text{ex}} = 300 \text{ nm}$ .

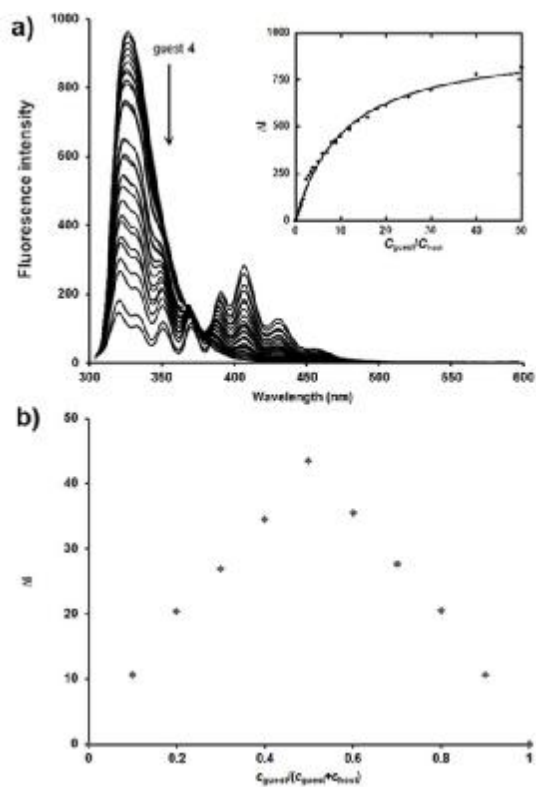

**Figure S12.** Fluorescence titration spectra of benzo[6]uril **2** with guest **4**. **a)** The host concentration was fixed at  $1.0 \times 10^{-5} \text{ mol}\cdot\text{L}^{-1}$  in DMSO. Insets: nonlinear fitting of the changes in fluorescence intensity upon addition of the guest ( $\lambda_{em} = 326 \text{ nm}$ ,  $\lambda_{ex} = 300 \text{ nm}$ ). **b)** Job's plots of the interaction between benzo[6]uril **2** and a) guest **4**. The total concentration was maintained at  $1.0 \times 10^{-5} \text{ mol}\cdot\text{L}^{-1}$ , and fluorescence intensities were recorded at  $\lambda_{em} = 326 \text{ nm}$ ,  $\lambda_{ex} = 300 \text{ nm}$ .

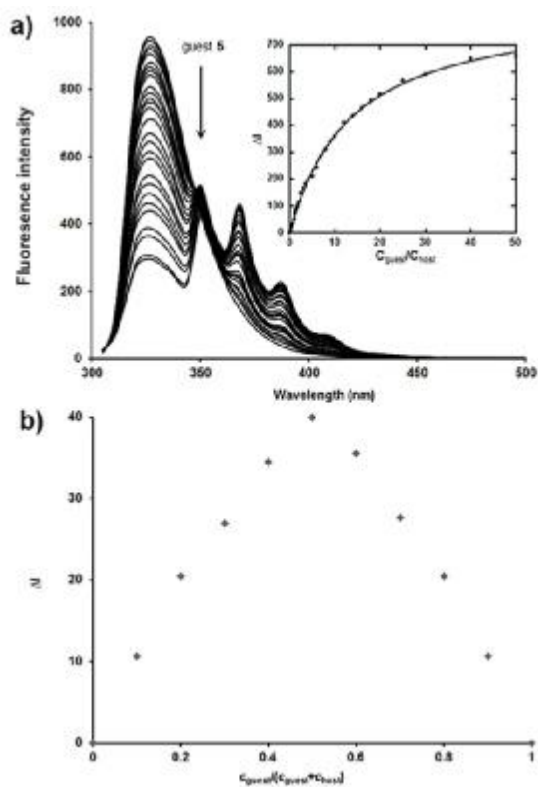

**Figure S13.** Fluorescence titration spectra of benzo[6]juril **2** with guest **5**. **a)** The host concentration was fixed at  $1.0 \times 10^{-5} \text{ mol}\cdot\text{L}^{-1}$  in DMSO. Insets: nonlinear fitting of the changes in fluorescence intensity upon addition of the guest ( $\lambda_{em} = 326 \text{ nm}$ ,  $\lambda_{ex} = 300 \text{ nm}$ ). **b)** Job's plots of the interaction between benzo[6]juril **2** and **a)** guest **5**. The total concentration was maintained at  $1.0 \times 10^{-5} \text{ mol}\cdot\text{L}^{-1}$ , and fluorescence intensities were recorded at  $\lambda_{em} = 326 \text{ nm}$ ,  $\lambda_{ex} = 300 \text{ nm}$ .

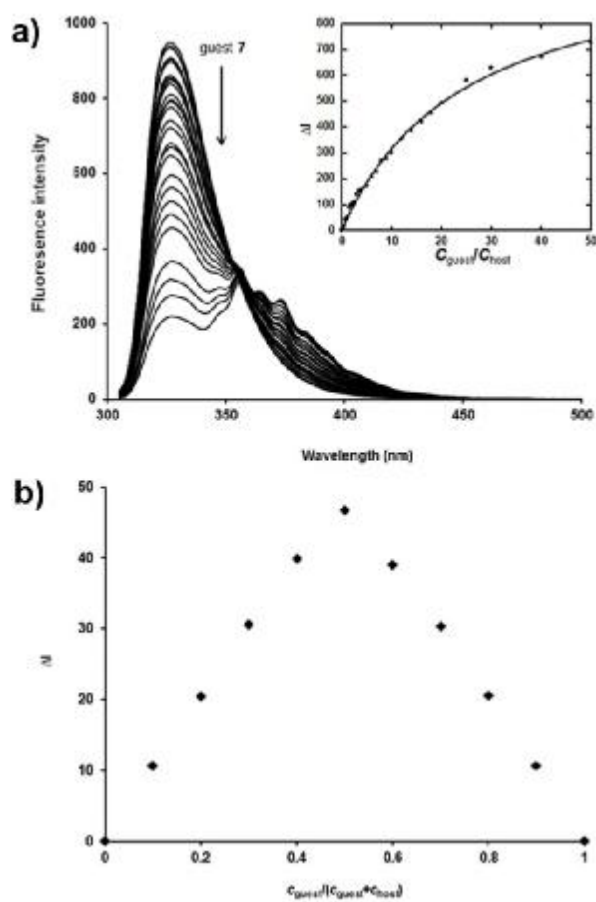

**Figure S14.** Fluorescence titration spectra of benzo[6]uril **2** with guest **7**. **a)** The host concentration was fixed at  $1.0 \times 10^{-5} \text{ mol}\cdot\text{L}^{-1}$  in DMSO. Insets: nonlinear fitting of the changes in fluorescence intensity upon addition of the guest ( $\lambda_{\text{em}} = 326 \text{ nm}$ ,  $\lambda_{\text{ex}} = 300 \text{ nm}$ ). **b)** Job's plots of the interaction between benzo[6]uril **2** and a) guest **7**. The total concentration was maintained at  $1.0 \times 10^{-5} \text{ mol}\cdot\text{L}^{-1}$ , and fluorescence intensities were recorded at  $\lambda_{\text{em}} = 326 \text{ nm}$ ,  $\lambda_{\text{ex}} = 300 \text{ nm}$ .

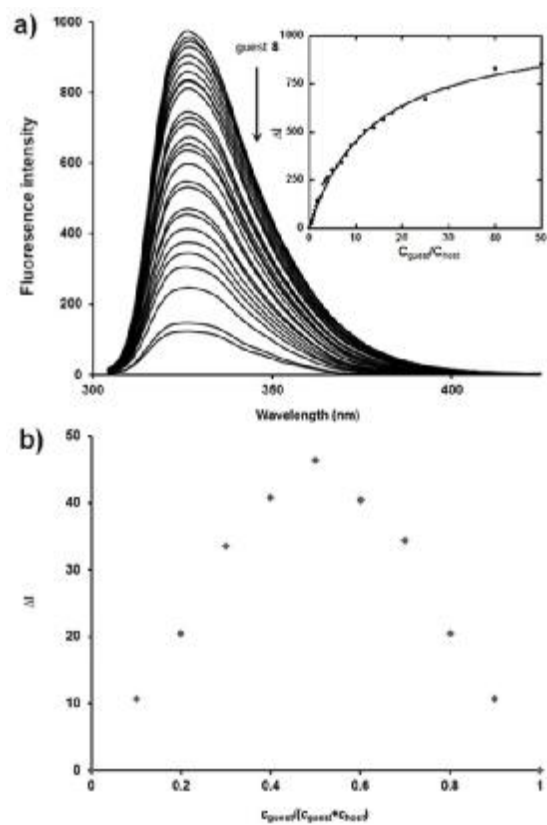

**Figure S15.** Fluorescence titration spectra of benzo[6]juril **2** with guest **8**. **a)** The host concentration was fixed at  $1.0 \times 10^{-5} \text{ mol}\cdot\text{L}^{-1}$  in DMSO. Inset: nonlinear fitting of the changes in fluorescence intensity upon addition of the guest ( $\lambda_{\text{em}} = 326 \text{ nm}$ ,  $\lambda_{\text{ex}} = 300 \text{ nm}$ ). **b)** Job's plots of the interaction between benzo[6]juril **2** and a) guest **8**. The total concentration was maintained at  $1.0 \times 10^{-5} \text{ mol}\cdot\text{L}^{-1}$ , and fluorescence intensities were recorded at  $\lambda_{\text{em}} = 326 \text{ nm}$ ,  $\lambda_{\text{ex}} = 300 \text{ nm}$ .



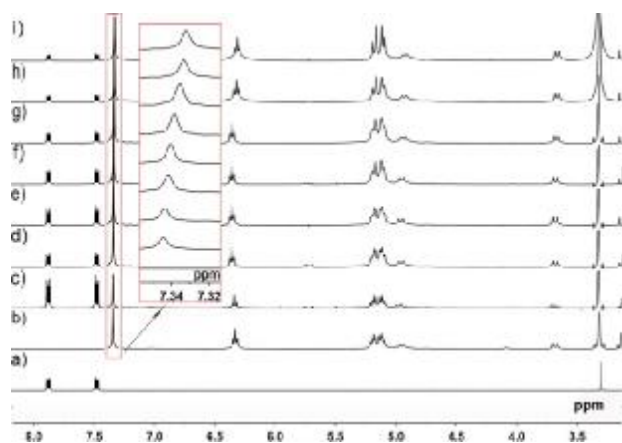

**Figure S16.**  $^1\text{H}$  NMR spectra (400 MHz,  $[\text{D}_6]\text{DMSO}$ ) of (b) free benzo[6]juril **2** ( $2.0 \times 10^{-3} \text{ mol}\cdot\text{L}^{-1}$ ), and in the presence of (c) 0.5 equiv; (d) 1 equiv; (e) 1.5 equiv; (f) 2 equiv; (g) 2.5 equiv; (h) 3 equiv; (i) 3.5 equiv of guest **3**, and (a) free guest **3**.

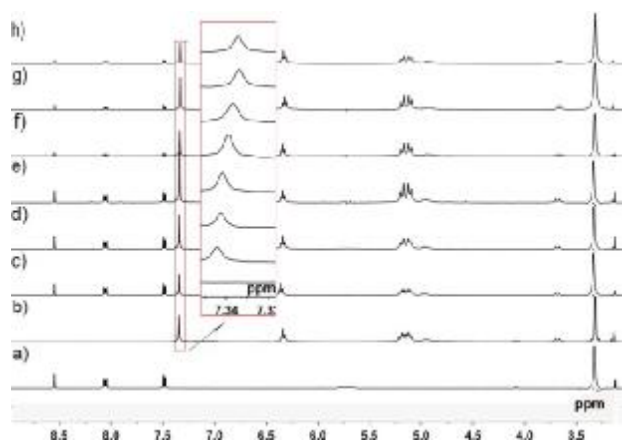

**Figure S17.**  $^1\text{H}$  NMR spectra (400 MHz,  $[\text{D}_6]\text{DMSO}$ ) of (b) free benzo[6]juril **2** ( $2.0 \times 10^{-3} \text{ mol}\cdot\text{L}^{-1}$ ), and in the presence of (c) 0.5 equiv; (d) 1 equiv; (e) 1.5 equiv; (f) 2 equiv; (g) 2.5 equiv; (h) 2.5 equiv; (i) 3 equiv of guest **4**, and (a) free guest **4**.

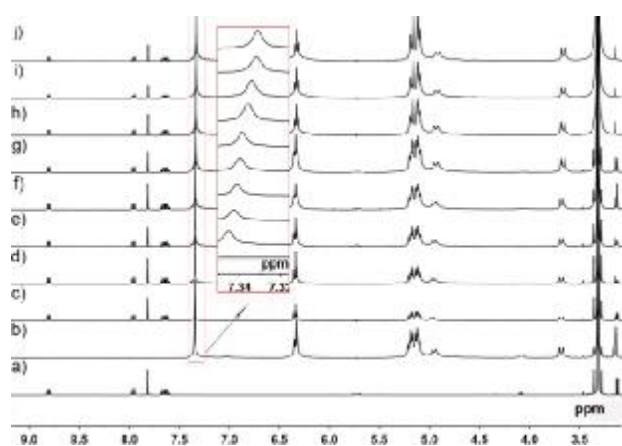

**Figure S18.**  $^1\text{H}$  NMR spectra (400 MHz,  $[\text{D}_6]\text{DMSO}$ ) of (b) free benzo[6]juril **2** ( $2.0 \times 10^{-3} \text{ mol} \cdot \text{L}^{-1}$ ), and in the presence of (c) 0.25 equiv; (d) 0.5 equiv; (e) 0.75 equiv; (f) 1 equiv; (g) 1.5 equiv; (h) 2 equiv; (i) 2.5 equiv; (j) 3 equiv of guest **5**, and (a) free guest **5**.

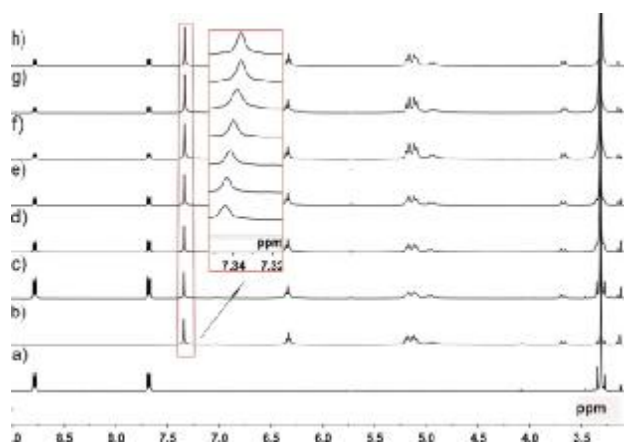

**Figure S19.**  $^1\text{H}$  NMR spectra (400 MHz,  $[\text{D}_6]\text{DMSO}$ ) of (b) free benzo[6]juril **2** ( $2.0 \times 10^{-3} \text{ mol}\cdot\text{L}^{-1}$ ), and in the presence of (c) 0.5 equiv; (d) 1 equiv; (e) 1.5 equiv; (f) 2 equiv; (g) 2.5 equiv; (h) 3 equiv of guest **7**, and (a) free guest **7**.

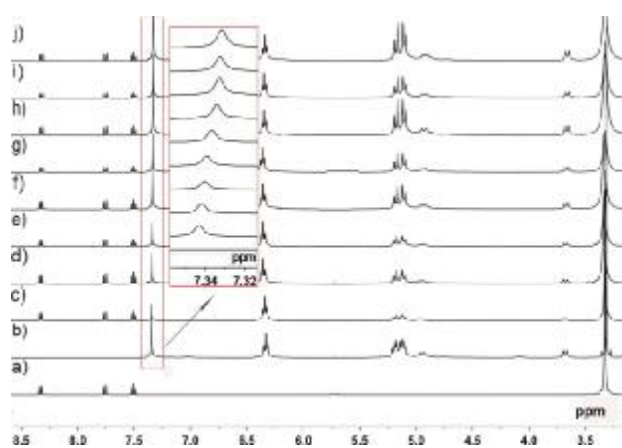

**Figure S20.**  $^1\text{H}$  NMR spectra (400 MHz,  $[\text{D}_6]\text{DMSO}$ ) of (b) free benzo[6]juril **2** ( $2.0 \times 10^{-3} \text{ mol} \cdot \text{L}^{-1}$ ), and in the presence of (c) 0.25 equiv; (d) 0.5 equiv; (e) 0.75 equiv; (f) 1 equiv; (g) 1.5 equiv; (h) 2 equiv; (i) 2.5 equiv; (j) 3 equiv of guest **8**, and (a) free guest **8**.

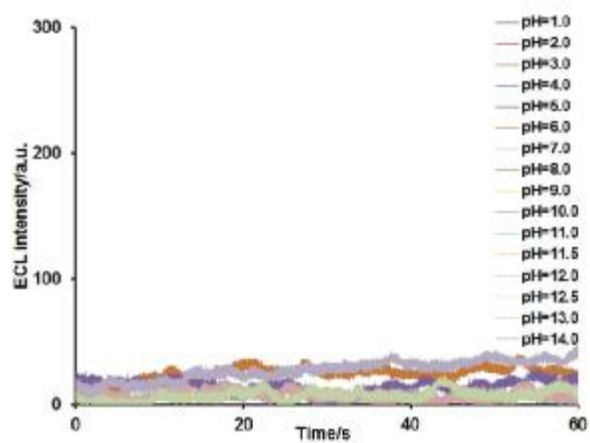

**Figure S21.** The ECL blank test in the PBS solution at different pH values.

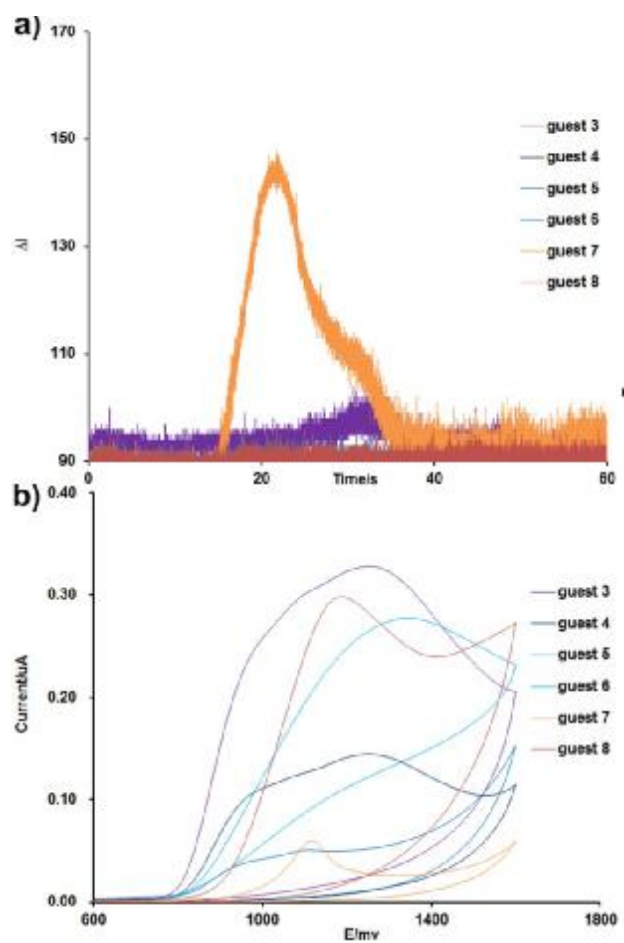

**Figure S22.** a) All guests on ECL intensity of benzo[6]uril 1/GCE; b) All guests on currents of benzo[6]uril 1/GCE;

## Coordinates of the optimized structures

### 1. Guest 3@benzo[6]uril 1

| Atomic Symbol | Coordinates (Angstroms) |             |             |
|---------------|-------------------------|-------------|-------------|
|               | X                       | Y           | Z           |
| C             | -1.73793000             | 0.18884500  | 3.66988100  |
| C             | 0.01364700              | 0.16603900  | 2.00478000  |
| C             | -0.52049200             | -0.07226900 | -0.36549000 |
| C             | 1.77465800              | 0.12074100  | 0.34877900  |
| C             | 1.38552700              | 0.21176900  | 1.65536200  |
| C             | 0.81112500              | -0.02129100 | -0.67487100 |
| C             | -2.70845600             | 0.02755800  | 2.65386900  |
| C             | -0.95704700             | 0.01326600  | 0.98156000  |
| C             | -2.32726800             | -0.05730100 | 1.34122700  |
| C             | -0.40870600             | 0.25146700  | 3.35523600  |
| H             | -2.05675400             | 0.25195800  | 4.70421400  |
| H             | -1.26376800             | -0.17133900 | -1.14900600 |
| H             | 2.82520400              | 0.15415100  | 0.09203900  |
| H             | 2.11851900              | 0.29371800  | 2.45033000  |
| H             | 1.13193600              | -0.08612400 | -1.70905200 |
| H             | -3.75623200             | -0.02207500 | 2.92753100  |
| H             | -3.06529500             | -0.19074100 | 0.55700000  |
| H             | 0.34705900              | 0.33841200  | 4.12786100  |
| C             | 6.13049800              | -2.04405400 | -1.17760800 |
| C             | 4.83344200              | -2.51715800 | -1.35740400 |
| C             | 3.90915700              | -1.59757000 | -1.84891500 |
| C             | 4.23162200              | -0.26178100 | -2.04060400 |
| C             | 5.49946400              | 0.24479700  | -1.75887500 |
| C             | 6.46060300              | -0.69204500 | -1.38930300 |
| N             | 7.28601000              | -2.67575500 | -0.72072000 |
| C             | 8.33186500              | -1.77057400 | -0.67404000 |
| N             | 7.80642300              | -0.54703000 | -1.05700800 |
| O             | 9.48416600              | -2.00434800 | -0.37936700 |
| C             | 4.15920200              | 2.60485000  | 0.03472000  |
| C             | 3.04494500              | 3.37308100  | 0.42820300  |
| C             | 4.58195800              | 2.56579300  | -1.29227100 |
| C             | 3.84588300              | 3.33858700  | -2.19353200 |
| C             | 2.78607700              | 4.13680000  | -1.79241900 |
| C             | 2.37051600              | 4.19847200  | -0.46210800 |
| N             | 4.62592900              | 1.96878000  | 1.18270800  |
| C             | 3.81532800              | 2.28569500  | 2.26098700  |
| N             | 2.85500200              | 3.15803700  | 1.78803000  |
| O             | 3.92025300              | 1.86078700  | 3.39352500  |
| C             | 1.32610700              | 5.20965900  | -0.05377000 |



|   |             |             |             |
|---|-------------|-------------|-------------|
| C | -1.12869900 | 5.79916100  | -0.36547200 |
| C | -0.11756100 | 4.83837900  | -0.33240900 |
| C | -0.50723000 | 3.52738300  | -0.59177600 |
| C | -1.81839200 | 3.20126300  | -0.92316000 |
| C | -2.82150600 | 4.16190200  | -1.01988400 |
| C | -2.45083400 | 5.46996600  | -0.70744400 |
| N | -1.10196100 | 7.17363200  | -0.13030500 |
| C | -2.36597400 | 7.70747100  | -0.30628700 |
| N | -3.18390100 | 6.65577900  | -0.68081900 |
| O | -2.69484800 | 8.86538800  | -0.15212300 |
| C | -4.22073600 | 3.81970800  | -1.50070000 |
| C | -5.00638400 | 1.58884700  | -0.53472400 |
| C | -4.54154600 | 2.35085100  | -1.60246600 |
| C | -4.41474900 | 1.68931900  | -2.82257900 |
| C | -4.74545500 | 0.34944800  | -2.97192600 |
| C | -5.23345800 | -0.41655200 | -1.91386800 |
| C | -5.36495900 | 0.23650400  | -0.69078400 |
| N | -5.23300000 | 1.91932500  | 0.79577400  |
| C | -5.73069000 | 0.82343900  | 1.47330900  |
| N | -5.80586400 | -0.20669400 | 0.55209700  |
| O | -6.02252700 | 0.76474700  | 2.65137000  |
| C | -5.53125000 | -1.88295800 | -2.11255900 |
| C | -4.68740500 | -4.06138800 | -1.03757900 |
| C | -4.44539600 | -2.79324600 | -1.56109200 |
| C | -3.11792400 | -2.37210600 | -1.54456800 |
| C | -2.09381600 | -3.14936300 | -1.02342700 |
| C | -2.32961900 | -4.40457600 | -0.46986000 |
| C | -3.65467700 | -4.83908800 | -0.48081400 |
| N | -5.86609400 | -4.79181200 | -0.89471800 |
| C | -5.60063900 | -5.99967400 | -0.27105100 |
| N | -4.24258300 | -6.01157500 | -0.00921800 |
| O | -6.40073500 | -6.87396100 | -0.01318400 |
| C | 0.94402500  | -3.97149300 | 0.69478400  |
| C | 0.19495500  | -4.74946600 | -0.18142300 |
| C | 0.83108500  | -5.13493700 | -1.36180300 |
| C | 2.15685800  | -4.82384400 | -1.61649800 |
| C | 2.94360400  | -4.11723000 | -0.70481400 |
| C | 2.30250200  | -3.67741500 | 0.45138300  |
| N | 0.62021800  | -3.41426100 | 1.92457100  |
| C | 1.73367200  | -2.80687100 | 2.47427700  |
| N | 2.76333100  | -2.97688200 | 1.56059100  |
| O | 1.79884900  | -2.23400100 | 3.54131600  |
| C | 4.41563500  | -3.92697200 | -0.98477200 |
| C | 7.53534700  | -4.08116600 | -0.47969100 |

|   |             |             |             |
|---|-------------|-------------|-------------|
| C | 8.69198000  | 0.57669100  | -1.27397700 |
| C | 5.81806300  | 1.17581900  | 1.38763800  |
| C | 1.69501300  | 3.47873600  | 2.59501700  |
| C | -0.02695800 | 8.01649800  | 0.34816300  |
| C | -4.60277600 | 6.87564000  | -0.85538900 |
| C | -4.87001800 | 3.12409800  | 1.51328900  |
| C | -6.28836500 | -1.51005300 | 0.95481900  |
| C | -7.18475700 | -4.53328500 | -1.43002900 |
| C | -3.64712700 | -7.13790100 | 0.67719400  |
| C | -0.68176500 | -3.27552600 | 2.54338300  |
| C | 4.03706500  | -2.32750000 | 1.78123200  |
| C | -1.20269800 | -5.24754600 | 0.09723300  |
| C | 5.75066200  | 1.74222100  | -1.78745600 |
| H | 2.88807700  | -1.92390600 | -2.00955700 |
| H | 3.45594300  | 0.43133300  | -2.34738200 |
| H | 4.13539900  | 3.32948900  | -3.23908000 |
| H | 2.27467100  | 4.75316900  | -2.52434800 |
| H | 1.55791800  | 6.12627100  | -0.59964900 |
| H | 1.45006600  | 5.46069000  | 1.00084800  |
| H | 0.23601100  | 2.73821000  | -0.56259900 |
| H | -2.06055200 | 2.16655700  | -1.13102600 |
| H | -4.35735200 | 4.25753700  | -2.49489900 |
| H | -4.96241500 | 4.30102600  | -0.86450000 |
| H | -4.05272300 | 2.24672300  | -3.67986500 |
| H | -4.62488700 | -0.12290600 | -3.94103800 |
| H | -5.65050800 | -2.06633000 | -3.18518900 |
| H | -6.49043800 | -2.12362400 | -1.66008700 |
| H | -2.88468300 | -1.39353000 | -1.94558000 |
| H | -1.08119300 | -2.76380600 | -1.03924300 |
| H | 0.27390600  | -5.72536900 | -2.08161800 |
| H | 2.61614800  | -5.17261100 | -2.53534300 |
| H | 4.98100900  | -4.25094800 | -0.11059700 |
| H | 4.69312200  | -4.61621600 | -1.78839000 |
| H | 7.15549900  | -4.68745600 | -1.30291500 |
| H | 8.61615000  | -4.20077400 | -0.41086000 |
| H | 7.08988000  | -4.41751400 | 0.45910600  |
| H | 8.52015500  | 1.01706600  | -2.25734600 |
| H | 8.57619900  | 1.34305500  | -0.50347200 |
| H | 9.70946500  | 0.19011400  | -1.22070700 |
| H | 6.71272900  | 1.72643100  | 1.08877300  |
| H | 5.87273200  | 0.96793100  | 2.45555000  |
| H | 5.77031600  | 0.23373100  | 0.84327000  |
| H | 0.77865500  | 3.30772800  | 2.02675300  |
| H | 1.70998000  | 2.81146600  | 3.45614200  |

|   |             |             |             |
|---|-------------|-------------|-------------|
| H | 1.72607800  | 4.50887100  | 2.95748300  |
| H | 0.73462800  | 8.17719100  | -0.41755800 |
| H | -0.47578500 | 8.97725400  | 0.59806500  |
| H | 0.43403400  | 7.59170200  | 1.24057800  |
| H | -4.75951500 | 7.95119600  | -0.78122100 |
| H | -4.94315800 | 6.53015400  | -1.83194200 |
| H | -5.18157600 | 6.38416500  | -0.06891000 |
| H | -5.54377800 | 3.95063100  | 1.27464600  |
| H | -4.96285900 | 2.89811800  | 2.57465200  |
| H | -3.84003600 | 3.40419900  | 1.28871400  |
| H | -5.54810000 | -2.28207100 | 0.74457300  |
| H | -6.46047100 | -1.45796700 | 2.02906200  |
| H | -7.23322500 | -1.75129400 | 0.46206600  |
| H | -7.12719400 | -4.25921700 | -2.48473200 |
| H | -7.74987300 | -5.45916800 | -1.32693600 |
| H | -7.70430700 | -3.74946900 | -0.87364100 |
| H | -4.46824800 | -7.79143900 | 0.96971800  |
| H | -2.97238200 | -7.69600500 | 0.02534500  |
| H | -3.11141600 | -6.81531400 | 1.57058500  |
| H | -1.00708200 | -4.20643400 | 3.01470900  |
| H | -0.59177500 | -2.50943200 | 3.31194000  |
| H | -1.41851700 | -2.95089400 | 1.80635200  |
| H | 4.85507900  | -3.04960100 | 1.82084700  |
| H | 4.23613300  | -1.59237400 | 1.00030600  |
| H | 3.96600900  | -1.82135500 | 2.74363200  |
| H | -1.26987700 | -6.25162300 | -0.32751300 |
| H | -1.34278100 | -5.37262700 | 1.17199500  |
| H | 5.97895900  | 2.05908800  | -2.80997000 |
| H | 6.63229100  | 1.98310500  | -1.19711200 |

---

Total energy: -3816.7983176 a.u.

BSSE corrected energy: -3816.8308357 a.u.

## 2. Guest 4@benzo[6]juril 1

| Atomic Symbol | Coordinates (Angstroms) |             |             |
|---------------|-------------------------|-------------|-------------|
|               | X                       | Y           | Z           |
| C             | -0.14471000             | 0.45964700  | 2.84872100  |
| C             | 0.40803000              | 0.18009700  | 0.49922300  |
| C             | -1.37033200             | -0.08571600 | -1.17627500 |
| C             | 0.94948200              | -0.07404000 | -1.84954700 |
| C             | 1.35948200              | 0.09496200  | -0.56300700 |
| C             | -0.43740300             | -0.16699000 | -2.16124300 |
| C             | -1.53928200             | 0.37114100  | 2.53757600  |
| C             | -0.98553900             | 0.08919700  | 0.18560500  |
| C             | -1.92430000             | 0.17758500  | 1.21027600  |
| C             | 0.79406800              | 0.35392500  | 1.82440500  |
| C             | -2.49004900             | 0.47282600  | 3.60092900  |
| C             | -2.06930400             | 0.65664700  | 4.88193600  |
| C             | -0.68071900             | 0.74696400  | 5.18975700  |
| C             | 0.25452200              | 0.64677500  | 4.20748700  |
| H             | -2.42880600             | -0.13739100 | -1.40411400 |
| H             | 1.67308800              | -0.13150500 | -2.65413700 |
| H             | 2.41434800              | 0.17741300  | -0.32223000 |
| H             | -0.74448900             | -0.29469800 | -3.19402100 |
| H             | -2.97633100             | 0.08326100  | 0.96693400  |
| H             | 1.84633700              | 0.38928600  | 2.08024900  |
| H             | -3.54888700             | 0.40226100  | 3.37238100  |
| H             | -2.79774900             | 0.73368400  | 5.68155100  |
| H             | -0.37331200             | 0.89058400  | 6.21952900  |
| H             | 1.31460100              | 0.71161300  | 4.42311600  |
| C             | 6.40089900              | -1.73249300 | -1.07115100 |
| C             | 5.17440400              | -2.27344500 | -1.44225500 |
| C             | 4.25543500              | -1.38505000 | -1.99571000 |
| C             | 4.50184100              | -0.02273200 | -2.06497100 |
| C             | 5.68199600              | 0.54521800  | -1.58777300 |
| C             | 6.65137300              | -0.34878200 | -1.14174500 |
| N             | 7.53037800              | -2.32058600 | -0.50478800 |
| C             | 8.48983900              | -1.35429200 | -0.25450500 |
| N             | 7.92587900              | -0.14173400 | -0.61655400 |
| O             | 9.60905600              | -1.53487600 | 0.17400800  |
| C             | 3.89253700              | 2.80584900  | -0.02504600 |
| C             | 2.69521000              | 3.52065500  | 0.17228000  |
| C             | 4.53757800              | 2.78900100  | -1.25952600 |
| C             | 3.91881900              | 3.50636000  | -2.28438700 |
| C             | 2.76198100              | 4.24314100  | -2.07643700 |
| C             | 2.13286100              | 4.30004700  | -0.83317700 |

|   |             |             |             |
|---|-------------|-------------|-------------|
| N | 4.20753800  | 2.21157900  | 1.19483700  |
| C | 3.25018600  | 2.54567700  | 2.14220800  |
| N | 2.31874800  | 3.33381400  | 1.49695400  |
| O | 3.23607700  | 2.19708500  | 3.30521900  |
| C | 0.99915600  | 5.27096700  | -0.60841500 |
| C | -1.52529200 | 5.56862500  | -0.61476000 |
| C | -0.40927000 | 4.76594400  | -0.85488500 |
| C | -0.66052800 | 3.51754700  | -1.41708400 |
| C | -1.94673900 | 3.11394300  | -1.75217400 |
| C | -3.06382900 | 3.91672000  | -1.54688100 |
| C | -2.82370800 | 5.16376400  | -0.97236900 |
| N | -1.63742100 | 6.84514900  | -0.06288000 |
| C | -2.96101700 | 7.24696300  | -0.06637000 |
| N | -3.68171200 | 6.20865000  | -0.63065700 |
| O | -3.40405300 | 8.30088900  | 0.34000700  |
| C | -4.44453100 | 3.43850000  | -1.96143300 |
| C | -4.95677800 | 1.21550200  | -0.80086300 |
| C | -4.64354200 | 1.94090800  | -1.94799100 |
| C | -4.57594300 | 1.21019600  | -3.13243500 |
| C | -4.83177200 | -0.15463600 | -3.17493800 |
| C | -5.18496700 | -0.88435900 | -2.03988400 |
| C | -5.24424000 | -0.16346400 | -0.84704400 |
| N | -5.10376900 | 1.61940700  | 0.52251700  |
| C | -5.48770000 | 0.54333700  | 1.29963600  |
| N | -5.56517300 | -0.54633800 | 0.45182700  |
| O | -5.69104400 | 0.54512800  | 2.49788600  |
| C | -5.44666700 | -2.37152400 | -2.15121300 |
| C | -4.39826200 | -4.38340400 | -0.92716600 |
| C | -4.27465400 | -3.22426400 | -1.68981700 |
| C | -2.97242700 | -2.83606200 | -1.99408400 |
| C | -1.85899100 | -3.50900000 | -1.51452900 |
| C | -1.97236900 | -4.62808400 | -0.69430100 |
| C | -3.27065600 | -5.05123400 | -0.41299400 |
| N | -5.52144500 | -5.07430300 | -0.47219700 |
| C | -5.12830600 | -6.15445200 | 0.30242900  |
| N | -3.74681200 | -6.11906600 | 0.34740000  |
| O | -5.85509400 | -6.97328000 | 0.82387900  |
| C | 1.26328100  | -3.88790400 | 0.38490500  |
| C | 0.59367700  | -4.74695400 | -0.48094300 |
| C | 1.28473500  | -5.11992900 | -1.63344100 |
| C | 2.59555900  | -4.72997400 | -1.86192800 |
| C | 3.31168200  | -3.95435300 | -0.94892700 |
| C | 2.60616500  | -3.51355200 | 0.17036700  |
| N | 0.87055500  | -3.33647500 | 1.59780400  |

|   |             |             |             |
|---|-------------|-------------|-------------|
| C | 1.93108100  | -2.65795000 | 2.16818900  |
| N | 2.99001900  | -2.76279000 | 1.27755800  |
| O | 1.93971700  | -2.07736600 | 3.23211700  |
| C | 4.78774700  | -3.71400500 | -1.17393500 |
| C | 7.86787300  | -3.72327400 | -0.38075800 |
| C | 8.73066600  | 1.06074900  | -0.60493000 |
| C | 5.43088100  | 1.55921900  | 1.60916700  |
| C | 1.08017900  | 3.71153800  | 2.14788300  |
| C | -0.63622200 | 7.66967900  | 0.57838600  |
| C | -5.09542300 | 6.37166100  | -0.88691400 |
| C | -4.69099300 | 2.85987000  | 1.14933600  |
| C | -5.95065400 | -1.84124600 | 0.96811700  |
| C | -6.89969700 | -4.96297800 | -0.89744000 |
| C | -3.02267100 | -7.08188500 | 1.14912800  |
| C | -0.46857000 | -3.19169600 | 2.13415100  |
| C | 4.20019800  | -2.00874100 | 1.52384700  |
| C | -0.75046900 | -5.36693700 | -0.18275100 |
| C | 5.83228200  | 2.05474300  | -1.52675800 |
| H | 3.28788200  | -1.76625400 | -2.30022100 |
| H | 3.72918400  | 0.64057200  | -2.43559300 |
| H | 4.38171200  | 3.51136800  | -3.26552500 |
| H | 2.34856700  | 4.82518900  | -2.89335300 |
| H | 1.17079200  | 6.11730100  | -1.28144100 |
| H | 1.08206800  | 5.68087300  | 0.39720000  |
| H | 0.16589300  | 2.84072100  | -1.60468400 |
| H | -2.08332700 | 2.13486600  | -2.18790600 |
| H | -4.65019800 | 3.79218500  | -2.97718100 |
| H | -5.20649100 | 3.89352500  | -1.33173800 |
| H | -4.33360300 | 1.73269100  | -4.05174200 |
| H | -4.77247500 | -0.67356100 | -4.12585500 |
| H | -5.67090700 | -2.59560200 | -3.19887200 |
| H | -6.34465500 | -2.62455600 | -1.59304400 |
| H | -2.82335200 | -1.95469600 | -2.60318900 |
| H | -0.87291300 | -3.13425700 | -1.76176700 |
| H | 0.79178100  | -5.77278900 | -2.34621400 |
| H | 3.10236000  | -5.07883300 | -2.75539300 |
| H | 5.32956800  | -4.07801400 | -0.29996400 |
| H | 5.10743100  | -4.34840000 | -2.00666500 |
| H | 7.59751500  | -4.26265600 | -1.28956400 |
| H | 8.94619200  | -3.77794700 | -0.23341200 |
| H | 7.37926700  | -4.18591000 | 0.47967500  |
| H | 8.68249300  | 1.56441700  | -1.57165700 |
| H | 8.42015500  | 1.75000900  | 0.18401000  |
| H | 9.75668500  | 0.75130000  | -0.40757600 |

|   |             |             |             |
|---|-------------|-------------|-------------|
| H | 6.27450700  | 2.25548200  | 1.59214300  |
| H | 5.27403500  | 1.22584700  | 2.63428800  |
| H | 5.65178900  | 0.69807200  | 0.98106500  |
| H | 0.22741100  | 3.44628700  | 1.52028200  |
| H | 1.02325900  | 3.15466300  | 3.08172800  |
| H | 1.05827000  | 4.77916900  | 2.37896600  |
| H | 0.17332300  | 7.92143000  | -0.10707800 |
| H | -1.14044800 | 8.58585400  | 0.88360700  |
| H | -0.22827100 | 7.17982400  | 1.46603000  |
| H | -5.33428600 | 7.41058200  | -0.66135000 |
| H | -5.32788400 | 6.16671700  | -1.93310800 |
| H | -5.70338600 | 5.73177000  | -0.24255700 |
| H | -5.36055000 | 3.68267700  | 0.89234300  |
| H | -4.73765600 | 2.69875100  | 2.22545900  |
| H | -3.66853700 | 3.10784400  | 0.86167900  |
| H | -5.20507100 | -2.59565900 | 0.72129300  |
| H | -6.01627000 | -1.73848700 | 2.05029200  |
| H | -6.92992700 | -2.14169700 | 0.58829100  |
| H | -6.96223200 | -4.87444700 | -1.98368200 |
| H | -7.40207600 | -5.87543200 | -0.57736100 |
| H | -7.40457300 | -4.11380300 | -0.43158300 |
| H | -3.76276700 | -7.78109100 | 1.53659800  |
| H | -2.29521800 | -7.63054000 | 0.55064800  |
| H | -2.51905000 | -6.60041300 | 1.99044900  |
| H | -0.81774200 | -4.10961800 | 2.61309300  |
| H | -0.43045900 | -2.40243900 | 2.88440500  |
| H | -1.16007200 | -2.89917000 | 1.34157400  |
| H | 5.08668400  | -2.64415900 | 1.49671200  |
| H | 4.31016100  | -1.20347900 | 0.79519400  |
| H | 4.09885300  | -1.58215200 | 2.52147200  |
| H | -0.74319400 | -6.36701200 | -0.62684200 |
| H | -0.83795400 | -5.52445300 | 0.89244400  |
| H | 6.24238000  | 2.42311700  | -2.47245800 |
| H | 6.55866700  | 2.32398300  | -0.76230300 |

---

Total energy: -3970.4170394 a.u.

BSSE corrected energy: -3970.4492852 a.u.

## 3. Guest 5@benzo[6]juril 1

| Atomic Symbol | Coordinates (Angstroms) |             |             |
|---------------|-------------------------|-------------|-------------|
|               | X                       | Y           | Z           |
| C             | -1.63507300             | 0.05119000  | 1.33075000  |
| C             | 0.78971200              | -0.09376700 | 0.93604600  |
| C             | 1.55174000              | -0.02532500 | -1.45450300 |
| C             | 2.08782000              | -0.21928800 | 1.47087900  |
| C             | -1.88147600             | 0.11665300  | 0.00685000  |
| C             | 0.52653800              | -0.01695500 | -0.49264200 |
| C             | -0.80774500             | 0.09719300  | -0.94437300 |
| C             | -0.29623600             | -0.03323000 | 1.83578800  |
| C             | -0.06506000             | -0.06004900 | 3.22527000  |
| C             | -1.06463900             | 0.20300600  | -2.32511900 |
| C             | 2.29836800              | -0.24977800 | 2.83113600  |
| C             | 1.21333400              | -0.15913700 | 3.71701600  |
| C             | 1.27756500              | 0.06396500  | -2.79954700 |
| C             | -0.04426500             | 0.18386500  | -3.24447600 |
| H             | -2.44163100             | 0.06357000  | 2.05409200  |
| H             | -2.89625800             | 0.19039500  | -0.36372800 |
| H             | -0.91897800             | -0.01501100 | 3.89039800  |
| H             | -2.08819900             | 0.31091000  | -2.65520200 |
| H             | 3.30689200              | -0.32690700 | 3.22101400  |
| H             | 1.38665600              | -0.17809600 | 4.78682900  |
| H             | 2.09586600              | 0.06416400  | -3.51214400 |
| H             | -0.25865400             | 0.27018000  | -4.30350300 |
| C             | 3.09891100              | -5.06327600 | -0.35334400 |
| C             | 1.86480400              | -4.59080200 | -0.79974800 |
| C             | 1.89832400              | -3.44449500 | -1.58992100 |
| C             | 3.08837100              | -2.80094400 | -1.89172100 |
| C             | 4.32397300              | -3.23723000 | -1.42197700 |
| C             | 4.30662500              | -4.41577700 | -0.68083700 |
| N             | 3.43718800              | -6.17135600 | 0.42459200  |
| C             | 4.81018400              | -6.24962600 | 0.56841700  |
| N             | 5.33662500              | -5.15517800 | -0.09918900 |
| O             | 5.43466900              | -7.11222900 | 1.14859500  |
| C             | 5.34124500              | -0.21607700 | -0.40275700 |
| C             | 5.10654500              | 1.17434100  | -0.35952900 |
| C             | 5.35103700              | -0.92165700 | -1.60584700 |
| C             | 5.12292700              | -0.16443000 | -2.75549000 |
| C             | 4.91427800              | 1.20855400  | -2.71352800 |
| C             | 4.90936300              | 1.92420800  | -1.51729900 |
| N             | 5.54553000              | -0.62613400 | 0.91076500  |
| C             | 5.44778600              | 0.45726400  | 1.76589000  |



|   |             |             |             |
|---|-------------|-------------|-------------|
| N | 5.16693000  | 1.55527000  | 0.97616600  |
| O | 5.56116600  | 0.43826100  | 2.97497400  |
| C | 4.75559900  | 3.42911500  | -1.52519100 |
| C | 3.08386400  | 5.15414500  | -0.60918000 |
| C | 3.35310100  | 3.93993200  | -1.23731400 |
| C | 2.24301000  | 3.19337600  | -1.61733800 |
| C | 0.93901700  | 3.60621400  | -1.37706900 |
| C | 0.66031700  | 4.80936800  | -0.73486700 |
| C | 1.76480900  | 5.56892700  | -0.34551200 |
| N | 3.92880600  | 6.14834800  | -0.11810600 |
| C | 3.18033600  | 7.17094000  | 0.43890300  |
| N | 1.85432300  | 6.80272200  | 0.30183500  |
| O | 3.60566200  | 8.19182200  | 0.93794600  |
| C | -0.75767500 | 5.31140300  | -0.54632400 |
| C | -2.46281700 | 3.59685600  | 0.26907800  |
| C | -1.90520700 | 4.35054500  | -0.75831000 |
| C | -2.59300900 | 4.32961600  | -1.97159400 |
| C | -3.80424400 | 3.66774300  | -2.11947300 |
| C | -4.42612500 | 3.00052300  | -1.06144000 |
| C | -3.71841000 | 2.97143600  | 0.13948300  |
| N | -2.02590200 | 3.38855700  | 1.57104100  |
| C | -2.96911600 | 2.65466500  | 2.26548000  |
| N | -4.01386700 | 2.42415200  | 1.38364700  |
| O | -2.89544100 | 2.26680200  | 3.41303100  |
| C | -5.79123500 | 2.37277100  | -1.26431000 |
| C | -6.65221500 | -0.01920700 | -0.84384100 |
| C | -5.74975300 | 0.86237900  | -1.42910000 |
| C | -4.71338100 | 0.27391800  | -2.15352200 |
| C | -4.49454100 | -1.09353900 | -2.15922100 |
| C | -5.31276900 | -1.97368000 | -1.45168900 |
| C | -6.43851900 | -1.41300200 | -0.85812100 |
| N | -7.80588100 | 0.20688100  | -0.09500500 |
| C | -8.34129600 | -1.00176300 | 0.32054400  |
| N | -7.47014300 | -1.98667200 | -0.11606700 |
| O | -9.38085500 | -1.16598500 | 0.92041400  |
| C | -2.74076600 | -3.45396700 | 0.05751300  |
| C | -3.43597200 | -3.68877400 | -1.12832800 |
| C | -2.70872000 | -4.29559900 | -2.15469800 |
| C | -1.40532400 | -4.73901300 | -1.97922100 |
| C | -0.73082600 | -4.58501100 | -0.76813100 |
| C | -1.40319200 | -3.86946600 | 0.21770900  |
| N | -3.13773800 | -2.91829900 | 1.27863600  |
| C | -2.07727400 | -2.94376600 | 2.17329300  |
| N | -1.02006600 | -3.53790100 | 1.51069800  |

|   |             |             |             |
|---|-------------|-------------|-------------|
| O | -2.08066900 | -2.51645000 | 3.30849900  |
| C | 0.56600400  | -5.32019000 | -0.51646400 |
| C | 2.58957200  | -7.15765700 | 1.05887100  |
| C | 6.76026900  | -5.08663400 | -0.34858100 |
| C | 5.78002100  | -1.95007900 | 1.44309300  |
| C | 4.80562900  | 2.81721100  | 1.58853100  |
| C | 5.35774600  | 6.30738900  | -0.27385000 |
| C | 0.81552600  | 7.64527700  | 0.85354300  |
| C | -0.67706700 | 3.52672700  | 2.08743800  |
| C | -5.19149800 | 1.71374800  | 1.82449500  |
| C | -8.58386600 | 1.42025800  | 0.03479100  |
| C | -7.84654100 | -3.37987700 | 0.00075500  |
| C | -4.33058000 | -2.17453200 | 1.61210900  |
| C | 0.31501900  | -3.51782900 | 2.07534500  |
| C | -4.91790100 | -3.43143600 | -1.31485300 |
| C | 5.57218500  | -2.41649600 | -1.71462500 |
| H | 0.96789700  | -3.02944500 | -1.96109300 |
| H | 3.05362300  | -1.90662800 | -2.49569200 |
| H | 5.12736800  | -0.66911500 | -3.71602700 |
| H | 4.76731600  | 1.74963000  | -3.64241900 |
| H | 5.07074800  | 3.79055000  | -2.50976600 |
| H | 5.46342100  | 3.85248100  | -0.81565900 |
| H | 2.40183300  | 2.24683300  | -2.10971200 |
| H | 0.12014600  | 2.96797400  | -1.69256300 |
| H | -0.91147300 | 6.14311500  | -1.24210100 |
| H | -0.86902500 | 5.74348800  | 0.44814300  |
| H | -2.19094300 | 4.89286300  | -2.80713600 |
| H | -4.31369000 | 3.70755400  | -3.07674900 |
| H | -6.24356800 | 2.82784000  | -2.15105100 |
| H | -6.43510000 | 2.64031800  | -0.42926700 |
| H | -4.01482600 | 0.92949000  | -2.65934500 |
| H | -3.61423600 | -1.49038500 | -2.65311600 |
| H | -3.20580300 | -4.48166800 | -3.10097800 |
| H | -0.91333300 | -5.27306100 | -2.78547400 |
| H | 0.55690400  | -5.67301300 | 0.51378600  |
| H | 0.54493700  | -6.22489500 | -1.13384000 |
| H | 1.93040200  | -7.63783800 | 0.33524500  |
| H | 3.25482000  | -7.90638000 | 1.48746300  |
| H | 1.99550500  | -6.71591200 | 1.86261700  |
| H | 6.95788900  | -4.97827000 | -1.41681600 |
| H | 7.23284900  | -4.26632100 | 0.19559800  |
| H | 7.18845300  | -6.02299200 | 0.00804700  |
| H | 6.77593700  | -2.31333700 | 1.17928200  |
| H | 5.72147300  | -1.86505100 | 2.52735000  |

|   |             |             |             |
|---|-------------|-------------|-------------|
| H | 5.02049400  | -2.64925700 | 1.09448700  |
| H | 3.85453500  | 3.17332300  | 1.19244700  |
| H | 4.70716100  | 2.63081500  | 2.65703100  |
| H | 5.57877400  | 3.57415700  | 1.43903100  |
| H | 5.65493100  | 6.14432800  | -1.31107800 |
| H | 5.59068000  | 7.33280800  | 0.01168900  |
| H | 5.91805900  | 5.63401400  | 0.37919900  |
| H | 1.30911200  | 8.54705900  | 1.21412400  |
| H | 0.08083100  | 7.91900000  | 0.09608700  |
| H | 0.31398600  | 7.16184300  | 1.69567300  |
| H | -0.43054600 | 4.56839600  | 2.30271400  |
| H | -0.62967000 | 2.95650700  | 3.01420300  |
| H | 0.04213700  | 3.11816700  | 1.37514000  |
| H | -5.40432700 | 0.86595600  | 1.17468800  |
| H | -4.98210000 | 1.35300300  | 2.83110200  |
| H | -6.06272700 | 2.37296400  | 1.86573000  |
| H | -8.66555300 | 1.92659100  | -0.92862100 |
| H | -9.57580600 | 1.12472600  | 0.37590200  |
| H | -8.15646900 | 2.10280100  | 0.77289700  |
| H | -8.88304100 | -3.40094400 | 0.33641300  |
| H | -7.76610700 | -3.87921300 | -0.96607500 |
| H | -7.23695800 | -3.90841200 | 0.73778900  |
| H | -5.23114300 | -2.78022700 | 1.50514900  |
| H | -4.22886300 | -1.87660900 | 2.65521100  |
| H | -4.41637300 | -1.28391600 | 0.98690800  |
| H | 0.62256800  | -4.50572100 | 2.42783300  |
| H | 1.02828200  | -3.14894200 | 1.33662900  |
| H | 0.29734900  | -2.83501300 | 2.92381300  |
| H | -5.24001100 | -3.97995600 | -2.20578100 |
| H | -5.44836400 | -3.88715500 | -0.48032800 |
| H | 5.91810500  | -2.63196100 | -2.73055200 |
| H | 6.38420000  | -2.70995600 | -1.05419600 |
| H | 2.93639500  | -0.29895200 | 0.80430000  |
| H | 2.58549100  | -0.08590100 | -1.14191800 |

---

Total energy: -3970.4281521 a.u.

BSSE corrected energy: -3970.4599270 a.u.

## 4. Guest 6@benzo[6]juril 1

| Atomic Symbol | Coordinates (Angstroms) |             |             |
|---------------|-------------------------|-------------|-------------|
|               | X                       | Y           | Z           |
| C             | -1.88562400             | 0.72305500  | 3.41970000  |
| C             | 0.46231900              | 0.44117300  | 2.75361900  |
| C             | 0.98594700              | -0.06686500 | 0.39907500  |
| C             | 2.78069400              | 0.08428000  | 2.02815600  |
| C             | 1.84144500              | 0.39797000  | 3.07050800  |
| C             | 2.37860300              | -0.12522700 | 0.75523800  |
| C             | -2.28745400             | 0.47249100  | 2.15728900  |
| C             | 0.03567200              | 0.19829500  | 1.41604800  |
| C             | -1.34495300             | 0.22775700  | 1.10311900  |
| C             | -0.48995900             | 0.72353200  | 3.76436000  |
| C             | -0.04190100             | 0.97197900  | 5.06235900  |
| C             | -1.75042800             | 0.02059700  | -0.21454200 |
| C             | 2.24963700              | 0.65277600  | 4.38208200  |
| C             | 1.31294400              | 0.93923600  | 5.36481700  |
| C             | 0.53852800              | -0.26375900 | -0.91027600 |
| C             | -0.81531000             | -0.21820000 | -1.21150200 |
| H             | -2.62052000             | 0.91613700  | 4.19336300  |
| H             | 3.82681800              | 0.01594700  | 2.30190300  |
| H             | 3.09834100              | -0.36281000 | -0.01969700 |
| H             | -3.34213100             | 0.43343500  | 1.91594900  |
| H             | -0.76858600             | 1.18374500  | 5.83953800  |
| H             | -2.80629500             | 0.05836900  | -0.45275800 |
| H             | 3.30863100              | 0.62862400  | 4.61770800  |
| H             | 1.64138900              | 1.13397800  | 6.37951000  |
| H             | 1.26596700              | -0.43993800 | -1.69417600 |
| H             | -1.14454500             | -0.36497600 | -2.23448300 |
| C             | 4.33430700              | -4.43095400 | -0.63638500 |
| C             | 2.96311500              | -4.23882500 | -0.79505200 |
| C             | 2.58400800              | -3.10316400 | -1.50560600 |
| C             | 3.51395200              | -2.19888900 | -1.99649100 |
| C             | 4.88711900              | -2.36855600 | -1.82768000 |
| C             | 5.27765300              | -3.53464800 | -1.17394500 |
| N             | 5.05369800              | -5.44211700 | -0.00207800 |
| C             | 6.41103200              | -5.22369100 | -0.15228000 |
| N             | 6.53996700              | -4.04019800 | -0.86241200 |
| O             | 7.31194100              | -5.93074100 | 0.24568000  |
| C             | 5.37300600              | 0.75087500  | -0.85898900 |
| C             | 4.79807900              | 2.02380700  | -0.68111500 |
| C             | 5.33817200              | 0.10189000  | -2.09062900 |
| C             | 4.72517000              | 0.79780600  | -3.13426000 |

|   |             |             |             |
|---|-------------|-------------|-------------|
| C | 4.19100700  | 2.06673200  | -2.96516100 |
| C | 4.22297300  | 2.72326100  | -1.73531200 |
| N | 5.88586000  | 0.37199500  | 0.37776700  |
| C | 5.63839600  | 1.36051600  | 1.31556400  |
| N | 4.97058000  | 2.37120600  | 0.65361600  |
| O | 5.92389000  | 1.32407600  | 2.49595400  |
| C | 3.72835000  | 4.14170000  | -1.61809100 |
| C | 1.74113400  | 5.59375400  | -0.99039700 |
| C | 2.27217100  | 4.32679400  | -1.23401400 |
| C | 1.37221200  | 3.26586400  | -1.18585100 |
| C | 0.00594700  | 3.45890500  | -0.99343900 |
| C | -0.54101900 | 4.72957900  | -0.83780900 |
| C | 0.36688100  | 5.78847300  | -0.79001500 |
| N | 2.34093400  | 6.85226900  | -0.94062900 |
| C | 1.38537000  | 7.81876900  | -0.67950300 |
| N | 0.16997000  | 7.15909800  | -0.61899500 |
| O | 1.57767300  | 9.00631700  | -0.51995800 |
| C | -2.03509700 | 4.98957900  | -0.81963100 |
| C | -3.67345300 | 3.17497800  | -0.07341200 |
| C | -2.94423400 | 3.81186600  | -1.06822800 |
| C | -3.19156600 | 3.39184300  | -2.37595600 |
| C | -4.15259700 | 2.43855500  | -2.66981000 |
| C | -4.94347100 | 1.84290300  | -1.68276900 |
| C | -4.67580700 | 2.22904600  | -0.37195600 |
| N | -3.65948200 | 3.34098100  | 1.30678400  |
| C | -4.62513800 | 2.53989300  | 1.88422500  |
| N | -5.24654000 | 1.86375600  | 0.84418500  |
| O | -4.86393300 | 2.41986400  | 3.06774900  |
| C | -5.99762800 | 0.83245900  | -2.08226200 |
| C | -6.32598000 | -1.62946500 | -1.40429300 |
| C | -5.53870800 | -0.60945000 | -1.93185100 |
| C | -4.24090400 | -0.97046400 | -2.29475200 |
| C | -3.72387600 | -2.23176800 | -2.04635300 |
| C | -4.46952000 | -3.22370500 | -1.41296100 |
| C | -5.79500800 | -2.90606600 | -1.13233700 |
| N | -7.65614800 | -1.64482800 | -0.98458500 |
| C | -7.97474600 | -2.89604500 | -0.48009500 |
| N | -6.81596100 | -3.64949800 | -0.54196700 |
| O | -9.06069400 | -3.26250700 | -0.08576900 |
| C | -1.67563600 | -3.97446100 | 0.22149200  |
| C | -2.33549800 | -4.53911800 | -0.86797500 |
| C | -1.53454700 | -5.20244500 | -1.79932500 |
| C | -0.17020300 | -5.36599400 | -1.61589400 |
| C | 0.48912300  | -4.86862500 | -0.49147300 |

|   |             |             |             |
|---|-------------|-------------|-------------|
| C | -0.28393000 | -4.12807500 | 0.39737000  |
| N | -2.14418100 | -3.27584900 | 1.32805600  |
| C | -1.09211100 | -2.99039200 | 2.18673000  |
| N | 0.04614100  | -3.50177900 | 1.59041200  |
| O | -1.15674100 | -2.41545600 | 3.25059000  |
| C | 1.93864400  | -5.22270600 | -0.26168900 |
| C | 4.58143200  | -6.57347100 | 0.76743700  |
| C | 7.83428900  | -3.65599400 | -1.38313600 |
| C | 6.61305700  | -0.81948500 | 0.75314100  |
| C | 4.31728100  | 3.42704100  | 1.40171300  |
| C | 3.74213100  | 7.21180100  | -0.94733700 |
| C | -1.01318300 | 7.87322900  | -0.18792200 |
| C | -2.63318500 | 3.95894600  | 2.12255600  |
| C | -6.31398500 | 0.92929700  | 1.11774500  |
| C | -8.71371700 | -0.69845500 | -1.26916900 |
| C | -6.84317500 | -5.04563700 | -0.16073500 |
| C | -3.46315300 | -2.74960800 | 1.60330000  |
| C | 1.35004700  | -3.25887000 | 2.16978200  |
| C | -3.83738700 | -4.54857500 | -1.03492000 |
| C | 5.85249400  | -1.30091400 | -2.32100200 |
| H | 1.52812100  | -2.91321500 | -1.65654500 |
| H | 3.16443700  | -1.31055800 | -2.50931700 |
| H | 4.67697600  | 0.32747900  | -4.11081700 |
| H | 3.74841800  | 2.57592900  | -3.81464500 |
| H | 3.88047800  | 4.62068400  | -2.59112700 |
| H | 4.37200500  | 4.68215200  | -0.92505200 |
| H | 1.73966800  | 2.25772900  | -1.33424400 |
| H | -0.65049500 | 2.59579400  | -1.00571600 |
| H | -2.24936000 | 5.71681700  | -1.60886000 |
| H | -2.32352800 | 5.48078200  | 0.10898900  |
| H | -2.63689900 | 3.85712500  | -3.18394300 |
| H | -4.32703500 | 2.16565300  | -3.70545600 |
| H | -6.26579800 | 1.02110400  | -3.12659500 |
| H | -6.90320200 | 1.00316900  | -1.50599900 |
| H | -3.59505600 | -0.21562400 | -2.72861000 |
| H | -2.68683600 | -2.43558000 | -2.28577200 |
| H | -2.00845000 | -5.64330100 | -2.66991700 |
| H | 0.40051700  | -5.93326200 | -2.34366700 |
| H | 2.10460500  | -5.38438500 | 0.80401000  |
| H | 2.10920700  | -6.19261200 | -0.73762200 |
| H | 3.94826700  | -7.22692900 | 0.16668700  |
| H | 5.46728300  | -7.12571600 | 1.07904500  |
| H | 4.03600500  | -6.24812600 | 1.65566100  |
| H | 7.78126700  | -3.49292900 | -2.46114100 |

|   |             |             |             |
|---|-------------|-------------|-------------|
| H | 8.22298800  | -2.75977400 | -0.89504300 |
| H | 8.51517300  | -4.48035100 | -1.17270600 |
| H | 7.58644800  | -0.86003900 | 0.25793100  |
| H | 6.77402300  | -0.75903400 | 1.82880600  |
| H | 6.04050300  | -1.71866700 | 0.52595900  |
| H | 3.26410100  | 3.48991800  | 1.12366000  |
| H | 4.39890700  | 3.16626600  | 2.45617700  |
| H | 4.80288300  | 4.39310600  | 1.24551800  |
| H | 4.22877800  | 6.90899300  | -1.87477900 |
| H | 3.78256500  | 8.29704200  | -0.86022200 |
| H | 4.26743300  | 6.77268900  | -0.09510700 |
| H | -0.71352300 | 8.91073600  | -0.04457900 |
| H | -1.80433200 | 7.83419700  | -0.93703200 |
| H | -1.38608600 | 7.47751300  | 0.75974000  |
| H | -2.77544000 | 5.03930500  | 2.20412500  |
| H | -2.70867300 | 3.52223300  | 3.11717200  |
| H | -1.64653600 | 3.73991500  | 1.70955200  |
| H | -6.11476300 | -0.03808000 | 0.65594700  |
| H | -6.35875300 | 0.80994100  | 2.19972700  |
| H | -7.27709000 | 1.31397600  | 0.77251900  |
| H | -8.65535600 | -0.35987500 | -2.30514400 |
| H | -9.65678200 | -1.22046900 | -1.10924300 |
| H | -8.68272200 | 0.16353600  | -0.59930000 |
| H | -7.88819000 | -5.30058500 | 0.01286000  |
| H | -6.44522600 | -5.67390600 | -0.95840600 |
| H | -6.28555700 | -5.22443100 | 0.76155900  |
| H | -4.20735200 | -3.54441400 | 1.68202400  |
| H | -3.39269500 | -2.23290500 | 2.55998300  |
| H | -3.76692000 | -2.04058100 | 0.83113400  |
| H | 1.74111400  | -4.14741000 | 2.67310700  |
| H | 2.04907600  | -2.92474300 | 1.40267000  |
| H | 1.22924000  | -2.46708100 | 2.90897000  |
| H | -4.08143200 | -5.29586300 | -1.79672400 |
| H | -4.28283400 | -4.91599500 | -0.11023700 |
| H | 6.02113100  | -1.43198300 | -3.39451900 |
| H | 6.82380500  | -1.41994900 | -1.84836400 |

---

Total energy: -4046.6454001 a.u.

BSSE corrected energy: -4046.6786181 a.u.

## 5. Guest 7@benzo[6]juril 1

| Atomic Symbol | Coordinates (Angstroms) |             |             |
|---------------|-------------------------|-------------|-------------|
|               | X                       | Y           | Z           |
| C             | 1.09181000              | 0.99535100  | 3.62974200  |
| C             | 1.98631400              | -0.11321500 | 1.59379800  |
| C             | 0.37503000              | -0.68700500 | -0.23229700 |
| C             | 3.08745100              | -0.60413000 | 0.87461700  |
| C             | -0.18609100             | 1.08017500  | 3.04332100  |
| C             | 0.63971700              | -0.10079300 | 1.01754000  |
| C             | -0.43478300             | 0.43584300  | 1.75163200  |
| C             | 2.18145600              | 0.31744400  | 2.91935100  |
| C             | 3.44031300              | 0.12032500  | 3.51169500  |
| C             | -1.73342300             | 0.34248000  | 1.22226700  |
| C             | 4.31930400              | -0.76403800 | 1.46825700  |
| C             | 4.49154200              | -0.42874200 | 2.81048300  |
| C             | -0.90315400             | -0.74802800 | -0.74333500 |
| C             | -1.97100100             | -0.23372800 | -0.00578800 |
| H             | 3.60349500              | 0.39666900  | 4.54457800  |
| H             | -2.57106000             | 0.71100500  | 1.79849700  |
| H             | 5.14455200              | -1.16384000 | 0.88860300  |
| H             | 5.45412100              | -0.55463600 | 3.29000400  |
| H             | -1.07366800             | -1.21110400 | -1.70782800 |
| H             | -2.98250100             | -0.29789300 | -0.39097600 |
| C             | 4.99629000              | -3.22400700 | -1.53430100 |
| C             | 3.63526100              | -3.45567600 | -1.71222200 |
| C             | 2.92598000              | -2.42854300 | -2.33760600 |
| C             | 3.51552700              | -1.22316200 | -2.68126000 |
| C             | 4.87243400              | -0.96193300 | -2.46572600 |
| C             | 5.60950000              | -2.02540400 | -1.95804100 |
| N             | 6.00661300              | -4.02031000 | -0.99562400 |
| C             | 7.23267000              | -3.39789000 | -1.14549400 |
| N             | 6.98019300              | -2.15460600 | -1.71323200 |
| O             | 8.31844800              | -3.85509400 | -0.86486800 |
| C             | 4.84028700              | 1.85864000  | -0.64268600 |
| C             | 3.87981300              | 2.60169500  | 0.07213900  |
| C             | 4.62715600              | 1.47956000  | -1.96721200 |
| C             | 3.48873300              | 2.01510000  | -2.57109100 |
| C             | 2.54770400              | 2.75273900  | -1.86958400 |
| C             | 2.68366600              | 3.01404500  | -0.50695300 |
| N             | 5.88436800              | 1.61210000  | 0.23970900  |
| C             | 5.61363300              | 2.17809900  | 1.47274400  |
| N             | 4.36617600              | 2.75840100  | 1.36555100  |
| O             | 6.33676400              | 2.16924600  | 2.44831400  |



|   |             |             |             |
|---|-------------|-------------|-------------|
| C | 1.55742100  | 3.61509700  | 0.31556300  |
| C | -0.15831000 | 5.18841300  | -0.79455300 |
| C | 0.30464100  | 3.92118900  | -0.46449300 |
| C | -0.48395300 | 2.85287000  | -0.89196000 |
| C | -1.69428500 | 3.03436600  | -1.53138300 |
| C | -2.22624200 | 4.30501700  | -1.76123500 |
| C | -1.40791000 | 5.37593100  | -1.42144800 |
| N | 0.38203800  | 6.45361000  | -0.58342600 |
| C | -0.47841900 | 7.42327200  | -1.06604300 |
| N | -1.59306800 | 6.75173500  | -1.54365300 |
| O | -0.28864400 | 8.62092400  | -1.08831600 |
| C | -3.66003600 | 4.46635000  | -2.24041800 |
| C | -4.71103200 | 2.62482800  | -0.79231200 |
| C | -4.49015600 | 3.22109700  | -2.03621300 |
| C | -4.99948700 | 2.54453500  | -3.14025300 |
| C | -5.67965900 | 1.33944200  | -3.02275500 |
| C | -5.87106600 | 0.71455800  | -1.79382800 |
| C | -5.35866200 | 1.37927500  | -0.67853100 |
| N | -4.34100700 | 3.00594200  | 0.49493300  |
| C | -4.70508900 | 2.02895300  | 1.39376100  |
| N | -5.34174000 | 1.03834100  | 0.67241900  |
| O | -4.49349900 | 2.02917400  | 2.59384900  |
| C | -6.60021300 | -0.60748400 | -1.73162300 |
| C | -6.05952400 | -2.88057400 | -0.67731400 |
| C | -5.69876000 | -1.80396700 | -1.48277100 |
| C | -4.42161100 | -1.85709900 | -2.03967900 |
| C | -3.53536600 | -2.88722000 | -1.75702500 |
| C | -3.85508100 | -3.92153700 | -0.88159300 |
| C | -5.14687400 | -3.90371500 | -0.35803000 |
| N | -7.23982200 | -3.15936100 | 0.01047100  |
| C | -7.09693300 | -4.33353900 | 0.73208600  |
| N | -5.80115200 | -4.76851300 | 0.51811600  |
| O | -7.94718300 | -4.87919900 | 1.40197500  |
| C | -0.55521800 | -4.15189400 | 0.14552600  |
| C | -1.39558400 | -4.73133400 | -0.80125300 |
| C | -0.78004000 | -5.20454200 | -1.96132200 |
| C | 0.59611200  | -5.16511800 | -2.13318000 |
| C | 1.45476200  | -4.68031200 | -1.14411700 |
| C | 0.84684000  | -4.17146200 | 0.00069300  |
| N | -0.82750400 | -3.57239100 | 1.37598000  |
| C | 0.35615500  | -3.25820900 | 2.02367500  |
| N | 1.38142800  | -3.62838200 | 1.16277700  |
| O | 0.47208800  | -2.76828400 | 3.12419100  |
| C | 2.95089500  | -4.76077600 | -1.33982300 |

|   |             |             |             |
|---|-------------|-------------|-------------|
| C | 5.93192700  | -5.34039000 | -0.40808200 |
| C | 8.06131200  | -1.47494600 | -2.40433100 |
| C | 7.12947100  | 0.92398200  | 0.01897800  |
| C | 3.80385800  | 3.48581000  | 2.48284300  |
| C | 1.70934600  | 6.80366200  | -0.12921300 |
| C | -2.62378600 | 7.47008500  | -2.26002700 |
| C | -3.65696400 | 4.19167700  | 0.97687300  |
| C | -5.73381400 | -0.18910200 | 1.33294300  |
| C | -8.55377900 | -2.57032800 | -0.13897000 |
| C | -5.34321400 | -5.99512800 | 1.13502000  |
| C | -2.10127600 | -3.17692400 | 1.93722500  |
| C | 2.73608900  | -3.72966600 | 1.66215300  |
| C | -2.85903100 | -5.01475300 | -0.55045600 |
| C | 5.42963800  | 0.43633100  | -2.72112300 |
| H | 1.86787800  | -2.57295400 | -2.52438800 |
| H | 2.88946900  | -0.43830600 | -3.08701200 |
| H | 3.31124400  | 1.80627600  | -3.62109100 |
| H | 1.65904500  | 3.09337400  | -2.38465300 |
| H | 1.90053700  | 4.49311100  | 0.85778500  |
| H | 1.28308300  | 2.88128000  | 1.08198600  |
| H | -0.13749600 | 1.84684300  | -0.69549100 |
| H | -2.27299200 | 2.15844300  | -1.79467700 |
| H | -3.68430400 | 4.71483100  | -3.30547200 |
| H | -4.12191500 | 5.31255100  | -1.72719700 |
| H | -4.84417700 | 2.96994400  | -4.12567800 |
| H | -6.06435000 | 0.85844000  | -3.91569500 |
| H | -7.12928200 | -0.74312300 | -2.68019600 |
| H | -7.37172100 | -0.55165100 | -0.96711700 |
| H | -4.09916400 | -1.04429100 | -2.68117300 |
| H | -2.54752500 | -2.87697000 | -2.20095100 |
| H | -1.39831400 | -5.65766800 | -2.72938900 |
| H | 1.02846100  | -5.56376700 | -3.04485700 |
| H | 3.40159300  | -5.17601100 | -0.44072900 |
| H | 3.14459700  | -5.49152500 | -2.13213400 |
| H | 5.47675400  | -6.05393100 | -1.09654000 |
| H | 6.95739800  | -5.64687400 | -0.20508000 |
| H | 5.37603100  | -5.32613200 | 0.53223800  |
| H | 7.79125100  | -1.30273600 | -3.44848300 |
| H | 8.32186900  | -0.52603300 | -1.93507600 |
| H | 8.93173600  | -2.12870700 | -2.35443000 |
| H | 7.70348700  | 1.39995700  | -0.78062100 |
| H | 7.69393800  | 0.99515500  | 0.94825500  |
| H | 6.96335000  | -0.13003500 | -0.21330100 |
| H | 2.82368900  | 3.09724400  | 2.75696400  |

|   |             |             |             |
|---|-------------|-------------|-------------|
| H | 4.48795200  | 3.34102300  | 3.31811000  |
| H | 3.73468600  | 4.55476800  | 2.26500500  |
| H | 2.45993600  | 6.20024700  | -0.64465600 |
| H | 1.85972900  | 7.85605100  | -0.36772200 |
| H | 1.81303400  | 6.67395500  | 0.95111400  |
| H | -2.26659300 | 8.49207100  | -2.38449400 |
| H | -2.79183400 | 7.02340200  | -3.24155400 |
| H | -3.56420900 | 7.49614400  | -1.70506700 |
| H | -4.01409900 | 5.07747600  | 0.45470300  |
| H | -3.89081200 | 4.28385600  | 2.03657100  |
| H | -2.57646900 | 4.10116600  | 0.85676700  |
| H | -5.12687900 | -1.02916400 | 0.99154000  |
| H | -5.56747200 | -0.03249700 | 2.39779900  |
| H | -6.78869900 | -0.41016500 | 1.17018100  |
| H | -8.78369700 | -2.40877600 | -1.19326300 |
| H | -9.26601100 | -3.27813000 | 0.28448000  |
| H | -8.64634400 | -1.62682700 | 0.40479600  |
| H | -6.21243200 | -6.44242900 | 1.61586700  |
| H | -4.95032500 | -6.68739100 | 0.38971300  |
| H | -4.58421000 | -5.80276200 | 1.89688200  |
| H | -2.62179200 | -4.02303700 | 2.39506600  |
| H | -1.89354900 | -2.43623800 | 2.70897500  |
| H | -2.72686200 | -2.72677600 | 1.16674900  |
| H | 2.98191500  | -4.76803400 | 1.91036100  |
| H | 3.44837400  | -3.33669100 | 0.94030000  |
| H | 2.79009500  | -3.12167000 | 2.56427500  |
| H | -3.11919800 | -5.90919700 | -1.12637600 |
| H | -2.96926200 | -5.29886200 | 0.49512700  |
| H | 5.36398600  | 0.65813300  | -3.79057100 |
| H | 6.48312000  | 0.48445300  | -2.46363600 |
| H | 2.98089300  | -0.87822500 | -0.16474600 |
| H | 1.18191500  | -1.12511200 | -0.80211500 |
| C | 1.30518200  | 1.62570800  | 4.86858200  |
| C | -1.19784300 | 1.79830300  | 3.70646600  |
| C | -0.96333600 | 2.40379600  | 4.92161800  |
| C | 0.29862700  | 2.31431500  | 5.50962800  |
| H | 0.49322700  | 2.79174000  | 6.46331400  |
| H | -1.76112000 | 2.95009900  | 5.41140100  |
| H | -2.18436000 | 1.89586400  | 3.27015200  |
| H | 2.28160900  | 1.59024500  | 5.33337200  |

---

Total energy: -4124.0559427 a.u.

BSSE corrected energy: -4124.0875543 a.u.

## 6. Guest 8@benzo[6]juril 1

| Atomic Symbol | Coordinates (Angstroms) |             |             |
|---------------|-------------------------|-------------|-------------|
|               | X                       | Y           | Z           |
| C             | -0.00295200             | 1.72813100  | 4.12813900  |
| C             | 1.23983500              | 0.75836400  | 2.18395700  |
| C             | -0.00080500             | -0.13123100 | 0.25785400  |
| C             | 2.40556100              | -0.23297100 | 0.29536000  |
| C             | 2.40676500              | 0.36249900  | 1.56644700  |
| C             | 1.22847000              | -0.46126800 | -0.35776100 |
| C             | -1.24750700             | 1.41934600  | 3.50203900  |
| C             | -0.00150200             | 0.48809100  | 1.53725100  |
| C             | -1.24352300             | 0.75719600  | 2.18313800  |
| C             | 1.24230900              | 1.41996400  | 3.50314000  |
| C             | -2.42180900             | 1.76854800  | 4.13871900  |
| C             | -2.41618300             | 2.40010900  | 5.39427600  |
| C             | -1.23486400             | 2.69496600  | 6.01426100  |
| C             | -0.00369300             | 2.37429400  | 5.39479900  |
| C             | 2.41585700              | 1.76939600  | 4.14108500  |
| C             | 1.22675500              | 2.69530700  | 6.01551900  |
| C             | 2.40877700              | 2.40079300  | 5.39671700  |
| C             | -1.22936800             | -0.46293400 | -0.35829200 |
| C             | -2.40967200             | 0.35975000  | 1.56514200  |
| C             | -2.40706900             | -0.23614200 | 0.29424800  |
| H             | 3.34205700              | -0.53206400 | -0.15731500 |
| H             | 3.35364600              | 0.48796600  | 2.07261800  |
| H             | 1.21700200              | -0.93004400 | -1.33538600 |
| H             | -3.38338300             | 1.57733400  | 3.67781700  |
| H             | -3.36129200             | 2.65201100  | 5.86149400  |
| H             | -1.22146000             | 3.18371500  | 6.98277500  |
| H             | 3.37796200              | 1.57859300  | 3.68112800  |
| H             | 1.21222000              | 3.18401600  | 6.98403700  |
| H             | 3.35335500              | 2.65288700  | 5.86490600  |
| H             | -1.21681800             | -0.93186700 | -1.33582200 |
| H             | -3.35695100             | 0.48429800  | 2.07080700  |
| H             | -3.34295000             | -0.53670000 | -0.15871900 |
| C             | 5.13897900              | -3.95767100 | -0.86371600 |
| C             | 3.75852200              | -4.05112000 | -1.02849800 |
| C             | 3.16559800              | -3.04552700 | -1.78805200 |
| C             | 3.88932800              | -1.97160300 | -2.28571800 |
| C             | 5.26186400              | -1.83756100 | -2.07753700 |
| C             | 5.87975100              | -2.89016000 | -1.40656900 |
| N             | 6.04618800              | -4.78265600 | -0.20127100 |
| C             | 7.32921700              | -4.28619300 | -0.34444600 |

|   |             |             |             |
|---|-------------|-------------|-------------|
| N | 7.21502300  | -3.10962700 | -1.06840500 |
| O | 8.35427000  | -4.78811400 | 0.06391700  |
| C | 5.07846700  | 1.31534700  | -1.06544200 |
| C | 4.28020000  | 2.46300300  | -0.90203400 |
| C | 5.20224600  | 0.68557700  | -2.30158700 |
| C | 4.50716000  | 1.27275800  | -3.36085900 |
| C | 3.75706000  | 2.42841000  | -3.20537600 |
| C | 3.63585500  | 3.06864700  | -1.97264900 |
| N | 5.60832800  | 1.02269800  | 0.18852000  |
| C | 5.14292800  | 1.93225500  | 1.12203400  |
| N | 4.33592400  | 2.81935200  | 0.44096900  |
| O | 5.37808900  | 1.92405300  | 2.31597300  |
| C | 2.92924800  | 4.39578900  | -1.87717700 |
| C | 0.69512900  | 5.55160200  | -1.61229300 |
| C | 1.42942800  | 4.36641600  | -1.65326800 |
| C | 0.69443300  | 3.18547700  | -1.58244200 |
| C | -0.70006600 | 3.18385400  | -1.58420000 |
| C | -1.43762400 | 4.36308800  | -1.65683900 |
| C | -0.70620600 | 5.54998600  | -1.61409600 |
| N | 1.10175500  | 6.88617800  | -1.63404400 |
| C | -0.00797000 | 7.71399200  | -1.60889000 |
| N | -1.11575000 | 6.88366200  | -1.63692900 |
| O | -0.00943100 | 8.92601200  | -1.55387800 |
| C | -2.93694300 | 4.38894600  | -1.88446400 |
| C | -4.28487300 | 2.45514200  | -0.90737700 |
| C | -3.64102000 | 3.06037400  | -1.97854600 |
| C | -3.76071100 | 2.41830600  | -3.21045400 |
| C | -4.50890100 | 1.26123100  | -3.36469500 |
| C | -5.20349000 | 0.67436600  | -2.30493500 |
| C | -5.08130300 | 1.30606400  | -1.06960300 |
| N | -4.34172800 | 2.81319500  | 0.43513800  |
| C | -5.14769800 | 1.92577700  | 1.11701700  |
| N | -5.61118900 | 1.01421500  | 0.18452300  |
| O | -5.38344600 | 1.91884000  | 2.31085000  |
| C | -5.98924700 | -0.59673100 | -2.53769300 |
| C | -5.87358400 | -2.90104800 | -1.40435800 |
| C | -5.25803100 | -1.84848800 | -2.07752400 |
| C | -3.88532600 | -1.98028000 | -2.28604600 |
| C | -3.15935400 | -3.05194500 | -1.78681300 |
| C | -3.74999000 | -4.05731700 | -1.02518100 |
| C | -5.13052000 | -3.96609200 | -0.85977000 |
| N | -7.20831700 | -3.12254700 | -1.06542800 |
| C | -7.31995600 | -4.29792500 | -0.33913400 |
| N | -6.03591100 | -4.79163400 | -0.19552700 |

|   |             |             |             |
|---|-------------|-------------|-------------|
| O | -8.34388400 | -4.80104300 | 0.07057300  |
| C | -0.70056600 | -4.26366900 | 0.46356400  |
| C | -1.42966700 | -5.01330900 | -0.45688700 |
| C | -0.68802900 | -5.70170100 | -1.41809500 |
| C | 0.69822200  | -5.70070700 | -1.41909800 |
| C | 1.44026800  | -5.01133400 | -0.45890400 |
| C | 0.71143100  | -4.26279300 | 0.46265400  |
| N | -1.10259500 | -3.46991300 | 1.52845600  |
| C | 0.00574000  | -2.97830300 | 2.20021200  |
| N | 1.11384800  | -3.46869100 | 1.52714800  |
| O | 0.00591300  | -2.27185200 | 3.18344000  |
| C | 2.94115000  | -5.17703300 | -0.42344100 |
| C | 5.82555800  | -6.02417700 | 0.50931900  |
| C | 8.40747400  | -2.47331900 | -1.58703000 |
| C | 6.49823200  | -0.04278200 | 0.59107200  |
| C | 3.46139900  | 3.72520000  | 1.16128800  |
| C | 2.41892300  | 7.45005000  | -1.42869200 |
| C | -2.43469700 | 7.44476200  | -1.43545800 |
| C | -3.46902800 | 3.72137600  | 1.15473000  |
| C | -6.50059500 | -0.05137600 | 0.58784200  |
| C | -8.40216000 | -2.48956400 | -1.58491700 |
| C | -5.81251600 | -6.03085300 | 0.51819300  |
| C | -2.43741600 | -3.16365300 | 1.99295400  |
| C | 2.44887300  | -3.16115800 | 1.99022700  |
| C | -2.93026900 | -5.18111400 | -0.41933200 |
| C | 5.99052900  | -0.58366400 | -2.53584900 |
| H | 2.09610300  | -3.08880400 | -1.95507300 |
| H | 3.36319000  | -1.18088000 | -2.80874100 |
| H | 4.57844500  | 0.81439400  | -4.34168500 |
| H | 3.26647000  | 2.86634200  | -4.06815900 |
| H | 3.10617700  | 4.91738700  | -2.82343300 |
| H | 3.41585300  | 5.00537500  | -1.11642000 |
| H | 1.21896400  | 2.23638400  | -1.56471500 |
| H | -1.22247000 | 2.23357000  | -1.56771000 |
| H | -3.11259400 | 4.90818200  | -2.83226700 |
| H | -3.42661000 | 4.99921400  | -1.12622800 |
| H | -3.27052300 | 2.85590300  | -4.07363600 |
| H | -4.57900800 | 0.80144400  | -4.34494000 |
| H | -6.20151500 | -0.67354600 | -3.60868400 |
| H | -6.95538400 | -0.52216100 | -2.04554600 |
| H | -3.36089700 | -1.18948300 | -2.81067000 |
| H | -2.08988400 | -3.09355100 | -1.95440600 |
| H | -1.21901500 | -6.28663100 | -2.16166000 |
| H | 1.22895200  | -6.28484400 | -2.16346800 |

|   |             |             |             |
|---|-------------|-------------|-------------|
| H | 3.25331600  | -5.33455900 | 0.60950500  |
| H | 3.17595800  | -6.10766200 | -0.94860300 |
| H | 5.26717000  | -6.73191600 | -0.10334600 |
| H | 6.81004300  | -6.43728300 | 0.72594000  |
| H | 5.29988900  | -5.85890300 | 1.45242100  |
| H | 8.32195300  | -2.32154200 | -2.66435800 |
| H | 8.60825700  | -1.51815400 | -1.09685200 |
| H | 9.23916900  | -3.14563900 | -1.37805000 |
| H | 7.47843800  | 0.06316200  | 0.12099700  |
| H | 6.61981600  | 0.04339500  | 1.66997600  |
| H | 6.07511400  | -1.01912100 | 0.35412300  |
| H | 2.42494200  | 3.56971400  | 0.85566900  |
| H | 3.55829700  | 3.49487100  | 2.22097000  |
| H | 3.74455700  | 4.76835900  | 1.00672200  |
| H | 3.10273400  | 7.18255700  | -2.23435400 |
| H | 2.29252600  | 8.53194900  | -1.41349700 |
| H | 2.83782400  | 7.13046300  | -0.47083500 |
| H | -2.31059800 | 8.52693000  | -1.42027600 |
| H | -3.11565200 | 7.17554900  | -2.24297300 |
| H | -2.85561700 | 7.12463700  | -0.47866600 |
| H | -3.75279900 | 4.76394800  | 0.99741900  |
| H | -3.56746000 | 3.49332000  | 2.21476300  |
| H | -2.43196500 | 3.56611700  | 0.85109600  |
| H | -6.07688200 | -1.02770100 | 0.35195500  |
| H | -6.62255000 | 0.03575700  | 1.66662400  |
| H | -7.48071700 | 0.05363800  | 0.11736600  |
| H | -8.31714200 | -2.33941700 | -2.66251600 |
| H | -9.23243500 | -3.16323700 | -1.37465700 |
| H | -8.60480900 | -1.53400500 | -1.09628500 |
| H | -6.79610600 | -6.44517900 | 0.73653000  |
| H | -5.25324500 | -6.73922200 | -0.09292700 |
| H | -5.28656800 | -5.86210400 | 1.46052800  |
| H | -2.89586500 | -4.02649500 | 2.48471800  |
| H | -2.34114100 | -2.35609600 | 2.71762700  |
| H | -3.06296200 | -2.82762300 | 1.16609000  |
| H | 2.90908000  | -4.02391900 | 2.48047700  |
| H | 3.07291900  | -2.82343900 | 1.16290300  |
| H | 2.35240600  | -2.35449700 | 2.71587700  |
| H | -3.16434400 | -6.11280900 | -0.94293400 |
| H | -3.24094400 | -5.33771700 | 0.61419000  |
| H | 6.20321900  | -0.65860400 | -3.60689200 |
| H | 6.95638400  | -0.50774600 | -2.04337600 |

---

Total energy: -4200.2626947 a.u.

BSSE corrected energy: -4200.2963798 a.u.

## 7. Guest 3@benzo[6]juril 2

| Atomic Symbol | Coordinates (Angstroms) |             |             |
|---------------|-------------------------|-------------|-------------|
|               | X                       | Y           | Z           |
| C             | -1.00959900             | -0.81181600 | 2.75691600  |
| C             | -0.75690000             | -0.33483000 | 0.38146000  |
| C             | 1.45541200              | 0.18455300  | -0.56115700 |
| C             | -0.51298200             | 0.16813300  | -1.97135300 |
| C             | -1.30772100             | -0.16975200 | -0.92226500 |
| C             | 0.88783100              | 0.34613400  | -1.78738000 |
| C             | 0.40247300              | -0.64081400 | 2.93765800  |
| C             | 0.64887400              | -0.15125300 | 0.56691700  |
| C             | 1.19556900              | -0.31209800 | 1.83792200  |
| C             | -1.55143000             | -0.66163200 | 1.47800700  |
| C             | 0.95826100              | -0.82966900 | 4.24047600  |
| C             | -1.81740800             | -1.14578900 | 3.88998200  |
| C             | 0.16045500              | -1.16077200 | 5.28957000  |
| C             | -1.24570300             | -1.31478200 | 5.11229400  |
| H             | 2.52423900              | 0.29497800  | -0.41557100 |
| H             | -0.94388100             | 0.30361800  | -2.95744600 |
| H             | -2.37290700             | -0.32317000 | -1.05440800 |
| H             | 1.49749900              | 0.60884300  | -2.64382300 |
| H             | 2.26263600              | -0.18267600 | 1.97530300  |
| H             | -2.60889200             | -0.82545300 | 1.32394300  |
| H             | 2.03001300              | -0.73541000 | 4.35974800  |
| H             | -2.89049100             | -1.23909200 | 3.75306700  |
| H             | 0.59199100              | -1.31140800 | 6.27228700  |
| H             | -1.86327500             | -1.56803300 | 5.96670300  |
| C             | -2.52567700             | 5.64490400  | -0.54292100 |
| C             | -1.31867600             | 4.95824900  | -0.67723400 |
| C             | -1.41864700             | 3.60919300  | -0.99529700 |
| C             | -2.64828500             | 2.98297000  | -1.14958200 |
| C             | -3.85732400             | 3.64642000  | -0.97842700 |
| C             | -3.76287500             | 5.00255300  | -0.67145200 |
| N             | -2.79420600             | 6.99517200  | -0.26913900 |
| C             | -4.16469100             | 7.21039600  | -0.28409300 |
| N             | -4.75194300             | 5.97268100  | -0.46343700 |
| O             | -4.73274900             | 8.27837300  | -0.17167100 |
| C             | -5.01352700             | 0.49673500  | -0.38136100 |
| C             | -5.05158100             | -0.88388900 | -0.64826600 |
| C             | -5.09325100             | 1.45538300  | -1.38646100 |
| C             | -5.12336300             | 0.96677300  | -2.68919100 |
| C             | -5.11433800             | -0.39437700 | -2.96152200 |
| C             | -5.10001600             | -1.36391000 | -1.95868400 |



|   |             |             |             |
|---|-------------|-------------|-------------|
| N | -4.94837500 | 0.65087700  | 1.00814800  |
| C | -4.99203200 | -0.58988400 | 1.60817200  |
| N | -5.06078500 | -1.52761100 | 0.59795000  |
| O | -4.94179600 | -0.82621000 | 2.80325800  |
| C | -5.12760500 | -2.82737700 | -2.33875000 |
| C | -3.70311400 | -4.79304900 | -1.51723200 |
| C | -3.80629100 | -3.53103700 | -2.08289700 |
| C | -2.59679900 | -2.88244500 | -2.32870000 |
| C | -1.37182600 | -3.43556900 | -1.98885300 |
| C | -1.27126400 | -4.66963200 | -1.34884200 |
| C | -2.47502200 | -5.31778300 | -1.09372100 |
| N | -4.68865100 | -5.71053000 | -1.13494500 |
| C | -4.11623900 | -6.73552300 | -0.39673800 |
| N | -2.74818800 | -6.51279300 | -0.40705300 |
| O | -4.71396700 | -7.64972500 | 0.12714700  |
| C | 0.06298500  | -5.29548900 | -0.99418500 |
| C | 2.03160800  | -3.80954500 | -0.26465900 |
| C | 1.29411900  | -4.46146100 | -1.25027700 |
| C | 1.81186100  | -4.40101200 | -2.54417100 |
| C | 3.01818700  | -3.78382500 | -2.83028000 |
| C | 3.80835400  | -3.19886800 | -1.84064200 |
| C | 3.27886900  | -3.21009800 | -0.55023800 |
| N | 1.81198700  | -3.64973000 | 1.11033700  |
| C | 2.89423900  | -3.01000100 | 1.68359400  |
| N | 3.79354300  | -2.75766800 | 0.66667400  |
| O | 3.05114000  | -2.73172800 | 2.85644300  |
| C | 5.18199000  | -2.67426500 | -2.20689900 |
| C | 6.46092300  | -0.54703400 | -1.55251000 |
| C | 5.34064400  | -1.17100300 | -2.08405700 |
| C | 4.28734300  | -0.32967500 | -2.43271400 |
| C | 4.30297700  | 1.02542100  | -2.14724600 |
| C | 5.35486100  | 1.63056700  | -1.46096100 |
| C | 6.45130000  | 0.81590000  | -1.20871200 |
| N | 7.66076200  | -1.08594700 | -1.06852100 |
| C | 8.39022300  | -0.09593400 | -0.44829300 |
| N | 7.65187800  | 1.06791500  | -0.53233100 |
| O | 9.50570200  | -0.22002100 | 0.02943700  |
| C | 3.04261100  | 3.39074400  | 0.25625800  |
| C | 3.85137400  | 3.59904000  | -0.86137800 |
| C | 3.29045200  | 4.36691000  | -1.88114400 |
| C | 2.03931600  | 4.95311900  | -1.76873200 |
| C | 1.25246400  | 4.80597000  | -0.62920400 |
| C | 1.75968300  | 3.96535100  | 0.35815400  |
| N | 3.26923100  | 2.70652300  | 1.45848100  |

|   |             |             |             |
|---|-------------|-------------|-------------|
| C | 2.19510200  | 2.88771500  | 2.29671700  |
| N | 1.25763700  | 3.63009500  | 1.62187500  |
| O | 2.08518700  | 2.45853400  | 3.44102200  |
| C | 0.01271900  | 5.64874000  | -0.47581900 |
| C | -1.89275800 | 8.12381200  | -0.24755200 |
| C | -6.19088000 | 5.84666000  | -0.52235800 |
| C | -4.63333400 | 1.83182600  | 1.78869800  |
| C | -4.97433900 | -2.92993300 | 0.96395700  |
| C | -6.06189600 | -5.81519800 | -1.55438700 |
| C | -1.92861200 | -7.10893000 | 0.62853900  |
| C | 0.70479100  | -4.06482600 | 1.95632600  |
| C | 5.03790500  | -2.09390200 | 1.00611000  |
| C | 8.40298600  | -2.27928300 | -1.48792300 |
| C | 8.18370000  | 2.30468700  | -0.02000700 |
| C | 4.50726900  | 2.15601500  | 2.00875900  |
| C | -0.08485500 | 3.71073100  | 2.18932000  |
| C | 5.26292000  | 3.08259200  | -1.02286800 |
| C | -5.18760700 | 2.93285900  | -1.11280300 |
| O | -6.96143100 | -5.11561900 | -0.73051100 |
| O | -1.79063600 | -6.29454500 | 1.75523100  |
| O | -0.54674900 | -3.77139800 | 1.41511800  |
| O | 4.95310000  | -0.70850700 | 0.98156500  |
| O | 9.55841900  | -1.96288300 | -2.19034700 |
| O | 7.60892200  | 2.69882500  | 1.19980300  |
| O | 4.24885700  | 1.05907300  | 2.83676700  |
| O | -0.83581000 | 2.55668700  | 1.98529200  |
| O | -1.30359600 | 8.38775000  | -1.49246200 |
| O | -6.67846000 | 5.66438500  | -1.82395800 |
| O | -5.74133400 | 2.66225400  | 2.01671300  |
| O | -3.66085500 | -3.36798200 | 1.16509200  |
| H | -0.51714700 | 3.01777500  | -1.10700200 |
| H | -2.66224400 | 1.93114000  | -1.39306700 |
| H | -5.17291200 | 1.67674900  | -3.50753300 |
| H | -5.14548600 | -0.72583900 | -3.99402300 |
| H | -5.38473700 | -2.89283600 | -3.40072900 |
| H | -5.94065100 | -3.31864000 | -1.80241600 |
| H | -2.61846000 | -1.89736400 | -2.77862100 |
| H | -0.46781100 | -2.87577600 | -2.19664400 |
| H | 0.16956300  | -6.21633500 | -1.57912000 |
| H | 0.05686500  | -5.60962600 | 0.04580500  |
| H | 1.25958800  | -4.88474200 | -3.34287500 |
| H | 3.38699900  | -3.79024400 | -3.85048000 |
| H | 5.39783700  | -2.98850000 | -3.23309200 |
| H | 5.91675800  | -3.18526500 | -1.58275200 |

|   |             |             |             |
|---|-------------|-------------|-------------|
| H | 3.39844400  | -0.76947600 | -2.87043900 |
| H | 3.43750900  | 1.62793500  | -2.39447700 |
| H | 3.87708000  | 4.54160500  | -2.77676300 |
| H | 1.67672700  | 5.58973700  | -2.56816200 |
| H | 0.03907000  | 6.10617600  | 0.51960900  |
| H | 0.08210700  | 6.48258800  | -1.17991400 |
| H | -1.07434100 | 7.93767200  | 0.44319200  |
| H | -2.49004600 | 8.96353300  | 0.11450900  |
| H | -6.50365800 | 4.98162500  | 0.05642800  |
| H | -6.58191900 | 6.75629800  | -0.06133500 |
| H | -3.88877300 | 2.42471800  | 1.26162200  |
| H | -4.20512900 | 1.46225000  | 2.72272900  |
| H | -5.41393800 | -3.53356600 | 0.17937500  |
| H | -5.56992300 | -3.04006200 | 1.87252000  |
| H | -6.29862100 | -6.88129500 | -1.57350800 |
| H | -6.16390200 | -5.39654600 | -2.55433200 |
| H | -2.44430200 | -8.01591800 | 0.94044900  |
| H | -0.96291300 | -7.38026300 | 0.19452900  |
| H | 0.87879100  | -3.57329900 | 2.91664000  |
| H | 0.71582000  | -5.14745000 | 2.10129900  |
| H | 5.80335400  | -2.39636000 | 0.29866900  |
| H | 5.30535800  | -2.46035600 | 1.99990400  |
| H | 7.77335900  | -2.85570400 | -2.15798000 |
| H | 8.62163800  | -2.86596300 | -0.58884400 |
| H | 9.26079200  | 2.15162100  | 0.07404900  |
| H | 7.98616200  | 3.10742100  | -0.72806800 |
| H | 5.03176400  | 2.94464500  | 2.56058900  |
| H | 5.13605700  | 1.80308800  | 1.19812700  |
| H | 0.05337400  | 3.92090100  | 3.25253600  |
| H | -0.62310200 | 4.52491300  | 1.71809500  |
| H | 5.75919900  | 3.71455500  | -1.76683500 |
| H | 5.81496500  | 3.23068300  | -0.09343700 |
| H | -5.76444100 | 3.40731300  | -1.91191700 |
| H | -5.76340300 | 3.07324700  | -0.19620700 |
| H | -7.00393400 | -5.57864000 | 0.10946500  |
| H | -1.58659600 | -5.38485500 | 1.49308000  |
| H | -0.69935300 | -2.82102500 | 1.36575300  |
| H | 4.59992800  | -0.37759500 | 1.82190800  |
| H | 10.14534400 | -1.51850200 | -1.56849100 |
| H | 7.86249000  | 2.06052500  | 1.87027900  |
| H | 3.54346700  | 1.32600900  | 3.45105700  |
| H | -0.48165900 | 1.85537800  | 2.54140200  |
| H | -1.98574300 | 8.70628500  | -2.08661300 |
| H | -6.56266100 | 6.48719000  | -2.30266600 |

|   |             |             |            |
|---|-------------|-------------|------------|
| H | -6.34298900 | 2.20230300  | 2.60517800 |
| H | -3.38344700 | -3.12554900 | 2.05150700 |

---

Total energy: -4719.4346682 a.u.

BSSE corrected energy: -4719.5020388 a.u.

## 8. Guest 4@benzo[6]juril 2

| Atomic Symbol | Coordinates (Angstroms) |             |             |
|---------------|-------------------------|-------------|-------------|
|               | X                       | Y           | Z           |
| C             | -1.00959900             | -0.81181600 | 2.75691600  |
| C             | -0.75690000             | -0.33483000 | 0.38146000  |
| C             | 1.45541200              | 0.18455300  | -0.56115700 |
| C             | -0.51298200             | 0.16813300  | -1.97135300 |
| C             | -1.30772100             | -0.16975200 | -0.92226500 |
| C             | 0.88783100              | 0.34613400  | -1.78738000 |
| C             | 0.40247300              | -0.64081400 | 2.93765800  |
| C             | 0.64887400              | -0.15125300 | 0.56691700  |
| C             | 1.19556900              | -0.31209800 | 1.83792200  |
| C             | -1.55143000             | -0.66163200 | 1.47800700  |
| C             | 0.95826100              | -0.82966900 | 4.24047600  |
| C             | -1.81740800             | -1.14578900 | 3.88998200  |
| C             | 0.16045500              | -1.16077200 | 5.28957000  |
| C             | -1.24570300             | -1.31478200 | 5.11229400  |
| H             | 2.52423900              | 0.29497800  | -0.41557100 |
| H             | -0.94388100             | 0.30361800  | -2.95744600 |
| H             | -2.37290700             | -0.32317000 | -1.05440800 |
| H             | 1.49749900              | 0.60884300  | -2.64382300 |
| H             | 2.26263600              | -0.18267600 | 1.97530300  |
| H             | -2.60889200             | -0.82545300 | 1.32394300  |
| H             | 2.03001300              | -0.73541000 | 4.35974800  |
| H             | -2.89049100             | -1.23909200 | 3.75306700  |
| H             | 0.59199100              | -1.31140800 | 6.27228700  |
| H             | -1.86327500             | -1.56803300 | 5.96670300  |
| C             | -2.52567700             | 5.64490400  | -0.54292100 |
| C             | -1.31867600             | 4.95824900  | -0.67723400 |
| C             | -1.41864700             | 3.60919300  | -0.99529700 |
| C             | -2.64828500             | 2.98297000  | -1.14958200 |
| C             | -3.85732400             | 3.64642000  | -0.97842700 |
| C             | -3.76287500             | 5.00255300  | -0.67145200 |
| N             | -2.79420600             | 6.99517200  | -0.26913900 |
| C             | -4.16469100             | 7.21039600  | -0.28409300 |
| N             | -4.75194300             | 5.97268100  | -0.46343700 |
| O             | -4.73274900             | 8.27837300  | -0.17167100 |
| C             | -5.01352700             | 0.49673500  | -0.38136100 |
| C             | -5.05158100             | -0.88388900 | -0.64826600 |
| C             | -5.09325100             | 1.45538300  | -1.38646100 |
| C             | -5.12336300             | 0.96677300  | -2.68919100 |
| C             | -5.11433800             | -0.39437700 | -2.96152200 |
| C             | -5.10001600             | -1.36391000 | -1.95868400 |

|   |             |             |             |
|---|-------------|-------------|-------------|
| N | -4.94837500 | 0.65087700  | 1.00814800  |
| C | -4.99203200 | -0.58988400 | 1.60817200  |
| N | -5.06078500 | -1.52761100 | 0.59795000  |
| O | -4.94179600 | -0.82621000 | 2.80325800  |
| C | -5.12760500 | -2.82737700 | -2.33875000 |
| C | -3.70311400 | -4.79304900 | -1.51723200 |
| C | -3.80629100 | -3.53103700 | -2.08289700 |
| C | -2.59679900 | -2.88244500 | -2.32870000 |
| C | -1.37182600 | -3.43556900 | -1.98885300 |
| C | -1.27126400 | -4.66963200 | -1.34884200 |
| C | -2.47502200 | -5.31778300 | -1.09372100 |
| N | -4.68865100 | -5.71053000 | -1.13494500 |
| C | -4.11623900 | -6.73552300 | -0.39673800 |
| N | -2.74818800 | -6.51279300 | -0.40705300 |
| O | -4.71396700 | -7.64972500 | 0.12714700  |
| C | 0.06298500  | -5.29548900 | -0.99418500 |
| C | 2.03160800  | -3.80954500 | -0.26465900 |
| C | 1.29411900  | -4.46146100 | -1.25027700 |
| C | 1.81186100  | -4.40101200 | -2.54417100 |
| C | 3.01818700  | -3.78382500 | -2.83028000 |
| C | 3.80835400  | -3.19886800 | -1.84064200 |
| C | 3.27886900  | -3.21009800 | -0.55023800 |
| N | 1.81198700  | -3.64973000 | 1.11033700  |
| C | 2.89423900  | -3.01000100 | 1.68359400  |
| N | 3.79354300  | -2.75766800 | 0.66667400  |
| O | 3.05114000  | -2.73172800 | 2.85644300  |
| C | 5.18199000  | -2.67426500 | -2.20689900 |
| C | 6.46092300  | -0.54703400 | -1.55251000 |
| C | 5.34064400  | -1.17100300 | -2.08405700 |
| C | 4.28734300  | -0.32967500 | -2.43271400 |
| C | 4.30297700  | 1.02542100  | -2.14724600 |
| C | 5.35486100  | 1.63056700  | -1.46096100 |
| C | 6.45130000  | 0.81590000  | -1.20871200 |
| N | 7.66076200  | -1.08594700 | -1.06852100 |
| C | 8.39022300  | -0.09593400 | -0.44829300 |
| N | 7.65187800  | 1.06791500  | -0.53233100 |
| O | 9.50570200  | -0.22002100 | 0.02943700  |
| C | 3.04261100  | 3.39074400  | 0.25625800  |
| C | 3.85137400  | 3.59904000  | -0.86137800 |
| C | 3.29045200  | 4.36691000  | -1.88114400 |
| C | 2.03931600  | 4.95311900  | -1.76873200 |
| C | 1.25246400  | 4.80597000  | -0.62920400 |
| C | 1.75968300  | 3.96535100  | 0.35815400  |
| N | 3.26923100  | 2.70652300  | 1.45848100  |

|   |             |             |             |
|---|-------------|-------------|-------------|
| C | 2.19510200  | 2.88771500  | 2.29671700  |
| N | 1.25763700  | 3.63009500  | 1.62187500  |
| O | 2.08518700  | 2.45853400  | 3.44102200  |
| C | 0.01271900  | 5.64874000  | -0.47581900 |
| C | -1.89275800 | 8.12381200  | -0.24755200 |
| C | -6.19088000 | 5.84666000  | -0.52235800 |
| C | -4.63333400 | 1.83182600  | 1.78869800  |
| C | -4.97433900 | -2.92993300 | 0.96395700  |
| C | -6.06189600 | -5.81519800 | -1.55438700 |
| C | -1.92861200 | -7.10893000 | 0.62853900  |
| C | 0.70479100  | -4.06482600 | 1.95632600  |
| C | 5.03790500  | -2.09390200 | 1.00611000  |
| C | 8.40298600  | -2.27928300 | -1.48792300 |
| C | 8.18370000  | 2.30468700  | -0.02000700 |
| C | 4.50726900  | 2.15601500  | 2.00875900  |
| C | -0.08485500 | 3.71073100  | 2.18932000  |
| C | 5.26292000  | 3.08259200  | -1.02286800 |
| C | -5.18760700 | 2.93285900  | -1.11280300 |
| O | -6.96143100 | -5.11561900 | -0.73051100 |
| O | -1.79063600 | -6.29454500 | 1.75523100  |
| O | -0.54674900 | -3.77139800 | 1.41511800  |
| O | 4.95310000  | -0.70850700 | 0.98156500  |
| O | 9.55841900  | -1.96288300 | -2.19034700 |
| O | 7.60892200  | 2.69882500  | 1.19980300  |
| O | 4.24885700  | 1.05907300  | 2.83676700  |
| O | -0.83581000 | 2.55668700  | 1.98529200  |
| O | -1.30359600 | 8.38775000  | -1.49246200 |
| O | -6.67846000 | 5.66438500  | -1.82395800 |
| O | -5.74133400 | 2.66225400  | 2.01671300  |
| O | -3.66085500 | -3.36798200 | 1.16509200  |
| H | -0.51714700 | 3.01777500  | -1.10700200 |
| H | -2.66224400 | 1.93114000  | -1.39306700 |
| H | -5.17291200 | 1.67674900  | -3.50753300 |
| H | -5.14548600 | -0.72583900 | -3.99402300 |
| H | -5.38473700 | -2.89283600 | -3.40072900 |
| H | -5.94065100 | -3.31864000 | -1.80241600 |
| H | -2.61846000 | -1.89736400 | -2.77862100 |
| H | -0.46781100 | -2.87577600 | -2.19664400 |
| H | 0.16956300  | -6.21633500 | -1.57912000 |
| H | 0.05686500  | -5.60962600 | 0.04580500  |
| H | 1.25958800  | -4.88474200 | -3.34287500 |
| H | 3.38699900  | -3.79024400 | -3.85048000 |
| H | 5.39783700  | -2.98850000 | -3.23309200 |
| H | 5.91675800  | -3.18526500 | -1.58275200 |

|   |             |             |             |
|---|-------------|-------------|-------------|
| H | 3.39844400  | -0.76947600 | -2.87043900 |
| H | 3.43750900  | 1.62793500  | -2.39447700 |
| H | 3.87708000  | 4.54160500  | -2.77676300 |
| H | 1.67672700  | 5.58973700  | -2.56816200 |
| H | 0.03907000  | 6.10617600  | 0.51960900  |
| H | 0.08210700  | 6.48258800  | -1.17991400 |
| H | -1.07434100 | 7.93767200  | 0.44319200  |
| H | -2.49004600 | 8.96353300  | 0.11450900  |
| H | -6.50365800 | 4.98162500  | 0.05642800  |
| H | -6.58191900 | 6.75629800  | -0.06133500 |
| H | -3.88877300 | 2.42471800  | 1.26162200  |
| H | -4.20512900 | 1.46225000  | 2.72272900  |
| H | -5.41393800 | -3.53356600 | 0.17937500  |
| H | -5.56992300 | -3.04006200 | 1.87252000  |
| H | -6.29862100 | -6.88129500 | -1.57350800 |
| H | -6.16390200 | -5.39654600 | -2.55433200 |
| H | -2.44430200 | -8.01591800 | 0.94044900  |
| H | -0.96291300 | -7.38026300 | 0.19452900  |
| H | 0.87879100  | -3.57329900 | 2.91664000  |
| H | 0.71582000  | -5.14745000 | 2.10129900  |
| H | 5.80335400  | -2.39636000 | 0.29866900  |
| H | 5.30535800  | -2.46035600 | 1.99990400  |
| H | 7.77335900  | -2.85570400 | -2.15798000 |
| H | 8.62163800  | -2.86596300 | -0.58884400 |
| H | 9.26079200  | 2.15162100  | 0.07404900  |
| H | 7.98616200  | 3.10742100  | -0.72806800 |
| H | 5.03176400  | 2.94464500  | 2.56058900  |
| H | 5.13605700  | 1.80308800  | 1.19812700  |
| H | 0.05337400  | 3.92090100  | 3.25253600  |
| H | -0.62310200 | 4.52491300  | 1.71809500  |
| H | 5.75919900  | 3.71455500  | -1.76683500 |
| H | 5.81496500  | 3.23068300  | -0.09343700 |
| H | -5.76444100 | 3.40731300  | -1.91191700 |
| H | -5.76340300 | 3.07324700  | -0.19620700 |
| H | -7.00393400 | -5.57864000 | 0.10946500  |
| H | -1.58659600 | -5.38485500 | 1.49308000  |
| H | -0.69935300 | -2.82102500 | 1.36575300  |
| H | 4.59992800  | -0.37759500 | 1.82190800  |
| H | 10.14534400 | -1.51850200 | -1.56849100 |
| H | 7.86249000  | 2.06052500  | 1.87027900  |
| H | 3.54346700  | 1.32600900  | 3.45105700  |
| H | -0.48165900 | 1.85537800  | 2.54140200  |
| H | -1.98574300 | 8.70628500  | -2.08661300 |
| H | -6.56266100 | 6.48719000  | -2.30266600 |



|   |             |             |            |
|---|-------------|-------------|------------|
| H | -6.34298900 | 2.20230300  | 2.60517800 |
| H | -3.38344700 | -3.12554900 | 2.05150700 |

---

Total energy: -4873.0885669 a.u.

BSSE corrected energy: -4873.1530255 a.u.

## 9. Guest 5@benzo[6]juril 2

| Atomic Symbol | Coordinates (Angstroms) |             |             |
|---------------|-------------------------|-------------|-------------|
|               | X                       | Y           | Z           |
| C             | -1.80062600             | -0.06085000 | 1.44237300  |
| C             | 0.63900700              | 0.13364600  | 1.29739900  |
| C             | 1.61712000              | 0.39170000  | -1.00027800 |
| C             | 1.87054600              | 0.23609100  | 1.96875900  |
| C             | -1.93304400             | 0.07745100  | 0.10868000  |
| C             | 0.50994100              | 0.23764800  | -0.14643600 |
| C             | -0.78069500             | 0.25512600  | -0.72428500 |
| C             | -0.52355200             | -0.01674400 | 2.07706800  |
| C             | -0.43399700             | -0.07228100 | 3.48368900  |
| C             | -0.91978900             | 0.47731300  | -2.10765100 |
| C             | 1.94662700              | 0.19791900  | 3.34332300  |
| C             | 0.78156100              | 0.04418900  | 4.11193300  |
| C             | 1.45870600              | 0.61589900  | -2.34709200 |
| C             | 0.17814500              | 0.66883400  | -2.90975900 |
| H             | -2.66547000             | -0.18605300 | 2.07146000  |
| H             | -2.91814200             | 0.06372000  | -0.33980200 |
| H             | -1.34874700             | -0.18425300 | 4.05561400  |
| H             | -1.91578900             | 0.52050600  | -2.52632700 |
| H             | 2.90953200              | 0.25026100  | 3.83896000  |
| H             | 0.84794100              | 0.01211100  | 5.19347900  |
| H             | 2.33497400              | 0.76435400  | -2.96813000 |
| H             | 0.05467700              | 0.85962400  | -3.96955400 |
| C             | 3.70043200              | -4.83249600 | -1.03395500 |
| C             | 2.40163500              | -4.38145600 | -1.25605500 |
| C             | 2.28138900              | -3.06716100 | -1.69752500 |
| C             | 3.38680500              | -2.24070800 | -1.82253500 |
| C             | 4.67537100              | -2.65225700 | -1.50957600 |
| C             | 4.81548400              | -3.99527800 | -1.18224800 |
| N             | 4.18146900              | -6.07667400 | -0.59023200 |
| C             | 5.56201100              | -6.03395500 | -0.52839500 |
| N             | 5.94728400              | -4.74467000 | -0.82653600 |
| O             | 6.31508300              | -6.96966700 | -0.31234600 |
| C             | 5.22595900              | 0.14380300  | 0.28806800  |
| C             | 4.98645100              | 1.48995500  | 0.63893200  |
| C             | 5.38811200              | -0.24940700 | -1.03741000 |
| C             | 5.20002000              | 0.74735000  | -1.99565900 |
| C             | 4.89922300              | 2.05580400  | -1.65105800 |
| C             | 4.80121000              | 2.48003600  | -0.32410700 |
| N             | 5.33118700              | -0.58685000 | 1.47971500  |
| C             | 5.17176200              | 0.27270000  | 2.55627100  |

|   |             |             |             |
|---|-------------|-------------|-------------|
| N | 4.98499800  | 1.54141600  | 2.03830500  |
| O | 5.17041100  | -0.03814900 | 3.73126900  |
| C | 4.51823900  | 3.94544100  | -0.06559200 |
| C | 2.65136500  | 5.64259100  | -0.51620400 |
| C | 3.06167300  | 4.34248100  | -0.23335500 |
| C | 2.03771700  | 3.41693900  | -0.08508000 |
| C | 0.69745300  | 3.73635200  | -0.24129500 |
| C | 0.27982300  | 5.03196900  | -0.52473100 |
| C | 1.29640000  | 5.97863300  | -0.65691800 |
| N | 3.38620400  | 6.82088300  | -0.71827100 |
| C | 2.53311700  | 7.86278700  | -1.02797800 |
| N | 1.24870400  | 7.35404900  | -0.94282500 |
| O | 2.84797000  | 9.00087800  | -1.31753400 |
| C | -1.18247500 | 5.41209700  | -0.64598800 |
| C | -2.77685800 | 3.55536500  | 0.20250000  |
| C | -2.21139700 | 4.31607400  | -0.82080300 |
| C | -2.77777700 | 4.14784500  | -2.08363900 |
| C | -3.89129600 | 3.35214100  | -2.29671500 |
| C | -4.52630100 | 2.66466100  | -1.26249800 |
| C | -3.92317300 | 2.75524400  | -0.00772500 |
| N | -2.46036500 | 3.45990600  | 1.56045100  |
| C | -3.33142100 | 2.59145600  | 2.18058100  |
| N | -4.26335100 | 2.20376900  | 1.23561600  |
| O | -3.27972900 | 2.23283000  | 3.34369000  |
| C | -5.81709700 | 1.92777000  | -1.55996600 |
| C | -6.49690700 | -0.50760900 | -1.08621100 |
| C | -5.65442500 | 0.42376100  | -1.67297200 |
| C | -4.54193400 | -0.09673100 | -2.33087900 |
| C | -4.19200700 | -1.43334200 | -2.25214100 |
| C | -4.94866100 | -2.34719700 | -1.51839500 |
| C | -6.14692900 | -1.86882100 | -1.00012500 |
| N | -7.67614000 | -0.33692900 | -0.35241200 |
| C | -8.06155000 | -1.55025600 | 0.16045700  |
| N | -7.11207700 | -2.48526600 | -0.18975300 |
| O | -9.11624500 | -1.78621700 | 0.73846100  |
| C | -2.18594600 | -3.71219600 | -0.09013400 |
| C | -2.94684300 | -3.92040000 | -1.23983500 |
| C | -2.25444300 | -4.39790900 | -2.35149100 |
| C | -0.91238700 | -4.74564800 | -2.29565700 |
| C | -0.16442100 | -4.62919900 | -1.12634300 |
| C | -0.81532100 | -4.03858100 | -0.04492000 |
| N | -2.54573800 | -3.30819000 | 1.20160300  |
| C | -1.45803900 | -3.42024800 | 2.03007200  |
| N | -0.38959400 | -3.80728600 | 1.26589800  |

|   |             |             |             |
|---|-------------|-------------|-------------|
| O | -1.43568700 | -3.21412700 | 3.24445400  |
| C | 1.19760100  | -5.27469200 | -1.04424600 |
| C | 3.50714200  | -7.35728400 | -0.56897100 |
| C | 7.35415800  | -4.55851800 | -1.19020300 |
| C | 5.07900900  | -2.01035700 | 1.69603600  |
| C | 4.70614400  | 2.65755800  | 2.92666500  |
| C | 4.81008300  | 7.03941200  | -0.65800800 |
| C | 0.12005700  | 8.20495300  | -1.23099600 |
| C | -1.34786900 | 3.98430300  | 2.34543000  |
| C | -5.32872400 | 1.29859300  | 1.62902100  |
| C | -8.70981000 | 0.69892900  | -0.45368900 |
| C | -7.53285900 | -3.88513900 | -0.09639800 |
| C | -3.87276600 | -3.01169600 | 1.74983600  |
| C | 0.92569000  | -3.94297300 | 1.89598300  |
| C | -4.44907900 | -3.76307600 | -1.30574200 |
| C | 5.80668900  | -1.64112700 | -1.45770600 |
| H | 1.29766800  | -2.65942700 | -1.90274500 |
| H | 3.23273100  | -1.21563000 | -2.11805000 |
| H | 5.31535700  | 0.48811900  | -3.04309000 |
| H | 4.75821600  | 2.79394700  | -2.43328400 |
| H | 5.12613100  | 4.51090200  | -0.77521700 |
| H | 4.84256400  | 4.23805000  | 0.93287600  |
| H | 2.29828100  | 2.40163300  | 0.16388600  |
| H | -0.03937500 | 2.95223000  | -0.11760100 |
| H | -1.29255100 | 6.07494200  | -1.50669600 |
| H | -1.47117700 | 6.01581900  | 0.22360700  |
| H | -2.36054600 | 4.70746800  | -2.91338000 |
| H | -4.32003300 | 3.29859700  | -3.29198800 |
| H | -6.22242800 | 2.32808800  | -2.49476100 |
| H | -6.54738800 | 2.17971300  | -0.79349300 |
| H | -3.89119000 | 0.59276400  | -2.85417200 |
| H | -3.26356000 | -1.76353000 | -2.70405300 |
| H | -2.80434500 | -4.56254700 | -3.27192500 |
| H | -0.44131800 | -5.18460800 | -3.16818000 |
| H | 1.27664400  | -5.76657700 | -0.07106700 |
| H | 1.23545500  | -6.08625300 | -1.77672600 |
| H | 2.63353200  | -7.31667200 | 0.07662000  |
| H | 4.23364100  | -8.05794700 | -0.15089500 |
| H | 7.47981800  | -3.55519900 | -1.58237400 |
| H | 7.94525300  | -4.67432400 | -0.27599300 |
| H | 5.33042200  | -2.18124900 | 2.74469900  |
| H | 5.74324300  | -2.59783900 | 1.06673100  |
| H | 5.46126300  | 3.43309800  | 2.78825100  |
| H | 4.80328100  | 2.24131600  | 3.93272200  |

|   |              |             |             |
|---|--------------|-------------|-------------|
| H | 5.21929100   | 6.53808200  | 0.21677600  |
| H | 4.94023400   | 8.11903400  | -0.55614900 |
| H | -0.66535700  | 8.03942800  | -0.49718300 |
| H | 0.49468800   | 9.22683800  | -1.14028200 |
| H | -1.78331900  | 4.37020600  | 3.27165500  |
| H | -0.87696200  | 4.79274200  | 1.79747700  |
| H | -6.22779400  | 1.55432000  | 1.07374100  |
| H | -5.49675800  | 1.49503400  | 2.68957100  |
| H | -8.33502800  | 1.49168500  | -1.09296300 |
| H | -8.88728600  | 1.08878200  | 0.55503600  |
| H | -6.75281200  | -4.51440200 | -0.50922900 |
| H | -7.66289300  | -4.10809600 | 0.96713100  |
| H | -4.32876400  | -3.95179000 | 2.08785200  |
| H | -4.47709700  | -2.56188900 | 0.96613200  |
| H | 0.89580800   | -4.81867400 | 2.55515000  |
| H | 1.67264500   | -4.07772400 | 1.11958700  |
| H | -4.82022100  | -4.40589500 | -2.11072600 |
| H | -4.87065300  | -4.17329400 | -0.38739500 |
| H | 6.29122700   | -1.56614100 | -2.43710900 |
| H | 6.58010500   | -1.98137500 | -0.76666600 |
| H | 2.77729600   | 0.33069900  | 1.39048700  |
| H | 2.62056800   | 0.34847400  | -0.59832500 |
| O | -0.45631900  | 7.96751700  | -2.48802300 |
| H | 0.17452800   | 8.23322700  | -3.15980700 |
| O | 5.50337900   | 6.53152700  | -1.76687400 |
| H | 5.25754200   | 7.05086900  | -2.53468200 |
| O | -5.06414500  | -0.04936300 | 1.39498000  |
| H | -4.63686900  | -0.46152700 | 2.15725800  |
| O | -0.35937900  | 3.04129400  | 2.60334500  |
| H | -0.72550500  | 2.37138800  | 3.18951200  |
| O | -9.87715000  | 0.22963100  | -1.03937100 |
| H | -10.23641300 | -0.43375200 | -0.43954800 |
| O | -8.68868900  | -4.14549200 | -0.82290300 |
| H | -9.40362500  | -3.68024100 | -0.37692100 |
| O | 3.04364300   | -7.75315300 | -1.83011800 |
| H | 3.80249900   | -7.92750600 | -2.39045000 |
| O | 7.76629200   | -5.43845400 | -2.18490800 |
| H | 7.74423700   | -6.31839500 | -1.79305100 |
| O | 3.78129000   | -2.39648100 | 1.38147700  |
| H | 3.15236200   | -2.17847700 | 2.08214100  |
| O | 3.47608600   | 3.26347000  | 2.69585900  |
| H | 2.75704400   | 2.64530000  | 2.86434800  |
| O | 1.29620900   | -2.80043500 | 2.59409000  |
| H | 0.63559200   | -2.61973100 | 3.27392900  |

|   |             |             |            |
|---|-------------|-------------|------------|
| O | -3.82142900 | -2.08967600 | 2.79435300 |
| H | -3.10439900 | -2.36224600 | 3.39013600 |

---

Total energy: -4873.0755871 a.u.

BSSE corrected energy: -4873.1410730 a.u.

## 10. Guest 6@benzo[6]juril 2

| Atomic Symbol | Coordinates (Angstroms) |             |             |
|---------------|-------------------------|-------------|-------------|
|               | X                       | Y           | Z           |
| C             | -2.17742000             | 1.97657600  | 3.53955500  |
| C             | 0.20907400              | 1.85252800  | 2.98765600  |
| C             | 0.89826200              | 0.73414900  | 0.90568900  |
| C             | 2.58445200              | 1.64598800  | 2.40090400  |
| C             | 1.56567000              | 2.10715000  | 3.30594800  |
| C             | 2.26214000              | 1.01390400  | 1.24975400  |
| C             | -2.48303900             | 1.30193600  | 2.40926600  |
| C             | -0.12400000             | 1.15634800  | 1.78595800  |
| C             | -1.47551000             | 0.86286000  | 1.48463700  |
| C             | -0.81105100             | 2.27573000  | 3.87707400  |
| C             | 1.87588000              | 2.78785600  | 4.48452800  |
| C             | -1.78406900             | 0.14696700  | 0.32557700  |
| C             | 0.55850100              | 0.01145200  | -0.23719700 |
| C             | 0.86997700              | 3.21528900  | 5.33954400  |
| C             | -0.76846700             | -0.27750000 | -0.52097100 |
| C             | -0.46085500             | 2.96191800  | 5.04209700  |
| H             | -2.96904400             | 2.30030400  | 4.20672000  |
| H             | 3.62170400              | 1.78176500  | 2.69182600  |
| H             | 3.02479800              | 0.64976200  | 0.57315300  |
| H             | -3.51638300             | 1.08013900  | 2.19515100  |
| H             | 2.91634200              | 2.97980000  | 4.72433900  |
| H             | -2.81752000             | -0.09982300 | 0.10628100  |
| H             | 1.35113700              | -0.33330800 | -0.89273000 |
| H             | 1.12614900              | 3.74699700  | 6.24849700  |
| H             | -1.01576100             | -0.84413000 | -1.41119600 |
| H             | -1.24275600             | 3.29056700  | 5.71826400  |
| C             | 4.24348100              | -4.78569800 | -0.44125700 |
| C             | 2.87485100              | -4.54077400 | -0.39608300 |
| C             | 2.43676500              | -3.40053900 | -1.06526000 |
| C             | 3.32066300              | -2.52202100 | -1.67408100 |
| C             | 4.69428400              | -2.73842900 | -1.67995800 |
| C             | 5.12779500              | -3.92897200 | -1.10902800 |
| N             | 5.01773000              | -5.80816600 | 0.12728200  |
| C             | 6.33862800              | -5.63699700 | -0.23882600 |
| N             | 6.41915300              | -4.45376800 | -0.94334900 |
| O             | 7.26037700              | -6.40897900 | -0.03383800 |
| C             | 5.21179200              | 0.48208800  | -0.94075400 |
| C             | 4.90529400              | 1.85559500  | -0.93752200 |
| C             | 5.15913300              | -0.27150600 | -2.11025800 |
| C             | 4.68648900              | 0.38366900  | -3.24536400 |

|   |             |             |             |
|---|-------------|-------------|-------------|
| C | 4.30663200  | 1.71637300  | -3.21856400 |
| C | 4.40892900  | 2.49922000  | -2.06895300 |
| N | 5.62216800  | 0.14194400  | 0.35736500  |
| C | 5.59129200  | 1.27510700  | 1.15494900  |
| N | 5.18355500  | 2.32510800  | 0.35179500  |
| O | 5.84676100  | 1.32768500  | 2.34203800  |
| C | 3.94227700  | 3.93163300  | -2.11602300 |
| C | 1.91851100  | 5.38351200  | -1.56671900 |
| C | 2.46318200  | 4.12522800  | -1.81861100 |
| C | 1.55327500  | 3.06992300  | -1.83028300 |
| C | 0.18154900  | 3.26270100  | -1.70135700 |
| C | -0.37221500 | 4.52920400  | -1.54102400 |
| C | 0.54011400  | 5.57383200  | -1.40095600 |
| N | 2.51762000  | 6.64278800  | -1.42979200 |
| C | 1.55305900  | 7.59691300  | -1.12641300 |
| N | 0.32964400  | 6.93636700  | -1.15597800 |
| O | 1.74097400  | 8.76833800  | -0.89895500 |
| C | -1.86127200 | 4.80590200  | -1.63530500 |
| C | -3.62764300 | 3.11631000  | -0.83664000 |
| C | -2.75922400 | 3.60750200  | -1.80575800 |
| C | -2.78931500 | 2.95809400  | -3.04042300 |
| C | -3.65873000 | 1.91444600  | -3.30338500 |
| C | -4.54894800 | 1.42907600  | -2.34465600 |
| C | -4.48375400 | 2.02475400  | -1.08822800 |
| N | -3.88967800 | 3.54080800  | 0.47189900  |
| C | -4.85572900 | 2.73590000  | 1.04419400  |
| N | -5.21904800 | 1.80310000  | 0.08566200  |
| O | -5.29158400 | 2.81303500  | 2.17583300  |
| C | -5.54116400 | 0.35673000  | -2.72891500 |
| C | -6.07699000 | -1.93144600 | -1.72863800 |
| C | -5.16186000 | -1.03036600 | -2.25104600 |
| C | -3.82708600 | -1.42396300 | -2.20983800 |
| C | -3.42688100 | -2.60539200 | -1.60675900 |
| C | -4.32844500 | -3.45562300 | -0.96674500 |
| C | -5.66534300 | -3.08258800 | -1.04205700 |
| N | -7.46510100 | -1.82614300 | -1.56738500 |
| C | -7.91571700 | -2.86724100 | -0.78696200 |
| N | -6.81528000 | -3.64408400 | -0.47125200 |
| O | -9.07551800 | -3.08080300 | -0.47818800 |
| C | -1.63379700 | -4.06105100 | 0.81775700  |
| C | -2.37674900 | -4.82677800 | -0.08060600 |
| C | -1.65718100 | -5.73595100 | -0.85198000 |
| C | -0.28875600 | -5.90399700 | -0.71416700 |
| C | 0.46232300  | -5.15461400 | 0.18692900  |



|   |             |             |             |
|---|-------------|-------------|-------------|
| C | -0.23552200 | -4.19794100 | 0.92175000  |
| N | -2.01539000 | -3.07679700 | 1.73812300  |
| C | -0.90162100 | -2.64467400 | 2.42044300  |
| N | 0.19101200  | -3.27761300 | 1.88520500  |
| O | -0.88975600 | -1.85100400 | 3.35850300  |
| C | 1.92762600  | -5.46279400 | 0.34275600  |
| C | 4.59871200  | -7.04333900 | 0.75145800  |
| C | 7.63013300  | -4.27103600 | -1.74974000 |
| C | 5.60137400  | -1.15827500 | 1.02120500  |
| C | 5.12440500  | 3.66524200  | 0.89426000  |
| C | 3.91196200  | 6.99901400  | -1.45039000 |
| C | -0.80971700 | 7.54025300  | -0.48892900 |
| C | -3.27428800 | 4.59548500  | 1.25069500  |
| C | -6.02369800 | 0.66123900  | 0.49360100  |
| C | -8.46345800 | -1.13753200 | -2.39217100 |
| C | -6.92573000 | -4.70405000 | 0.49745700  |
| C | -3.33334900 | -2.80292600 | 2.31540300  |
| C | 1.51391000  | -3.03444100 | 2.46933300  |
| C | -3.86760300 | -4.72163400 | -0.26842800 |
| C | 5.65291000  | -1.69239800 | -2.20899100 |
| O | 4.61546900  | 6.58503500  | -0.30505200 |
| O | -0.95734500 | 7.14100500  | 0.83933000  |
| O | -1.88270200 | 4.47821000  | 1.32987800  |
| O | -5.29130200 | -0.50561300 | 0.70299600  |
| O | -9.26665000 | -2.02368600 | -3.09712700 |
| O | -6.34223200 | -4.37755900 | 1.73452300  |
| O | -3.51085000 | -1.44845800 | 2.59088200  |
| O | 1.80509900  | -1.67976300 | 2.56971100  |
| O | 3.94792900  | -7.91503200 | -0.13113400 |
| O | 7.87652200  | -5.35264400 | -2.58736600 |
| O | 4.32368300  | -1.69174200 | 1.17102700  |
| O | 3.83543900  | 4.21399400  | 0.89292600  |
| H | 1.37704000  | -3.17404300 | -1.07663900 |
| H | 2.93719400  | -1.61208000 | -2.12084100 |
| H | 4.62852200  | -0.16767100 | -4.17780800 |
| H | 3.92271000  | 2.17812700  | -4.12179800 |
| H | 4.13644000  | 4.30710400  | -3.12652600 |
| H | 4.53638300  | 4.55182900  | -1.44958900 |
| H | 1.92117800  | 2.06113900  | -1.97211100 |
| H | -0.47384000 | 2.40178300  | -1.75236600 |
| H | -2.01416700 | 5.45493200  | -2.50577400 |
| H | -2.18495100 | 5.38811900  | -0.78068500 |
| H | -2.12292300 | 3.30795200  | -3.82146500 |
| H | -3.67438800 | 1.47234500  | -4.29399200 |

|   |             |             |             |
|---|-------------|-------------|-------------|
| H | -5.64635400 | 0.36652900  | -3.81869800 |
| H | -6.51814500 | 0.63650400  | -2.33378300 |
| H | -3.07530500 | -0.75563100 | -2.61438000 |
| H | -2.37385400 | -2.85944700 | -1.59478500 |
| H | -2.19625000 | -6.34497700 | -1.56920800 |
| H | 0.21939900  | -6.65268400 | -1.31157900 |
| H | 2.18171300  | -5.47508200 | 1.40785700  |
| H | 2.09246400  | -6.48441300 | -0.00915500 |
| H | 3.89367800  | -6.83539200 | 1.55220800  |
| H | 5.50750400  | -7.48025200 | 1.17077100  |
| H | 7.49788600  | -3.40092500 | -2.38261700 |
| H | 8.45817400  | -4.09905400 | -1.05489900 |
| H | 6.10240800  | -0.99145600 | 1.97677900  |
| H | 6.17058600  | -1.87609900 | 0.43653100  |
| H | 5.73828200  | 4.34581800  | 0.30408200  |
| H | 5.53900700  | 3.58151900  | 1.90109900  |
| H | 3.94250600  | 8.08731500  | -1.51412200 |
| H | 4.37669700  | 6.57060600  | -2.34315500 |
| H | -0.61273800 | 8.61076800  | -0.48116000 |
| H | -1.70709600 | 7.34801300  | -1.08233900 |
| H | -3.75820900 | 4.54801100  | 2.22812600  |
| H | -3.47216400 | 5.57012500  | 0.80209200  |
| H | -6.75337400 | 0.43206900  | -0.27912300 |
| H | -6.54537000 | 0.99496300  | 1.39292900  |
| H | -7.93925300 | -0.53330700 | -3.12588900 |
| H | -9.05425300 | -0.49092700 | -1.73360800 |
| H | -7.99393700 | -4.91181200 | 0.58876400  |
| H | -6.41044800 | -5.59449000 | 0.14331200  |
| H | -3.43710800 | -3.39972700 | 3.22977800  |
| H | -4.10410000 | -3.08885100 | 1.60878200  |
| H | 1.54489200  | -3.52226100 | 3.45130400  |
| H | 2.26783900  | -3.45726600 | 1.81335800  |
| H | -4.18554100 | -5.58425200 | -0.86257100 |
| H | -4.37076900 | -4.82335300 | 0.69565500  |
| H | 5.89056500  | -1.89599900 | -3.25849000 |
| H | 6.60003300  | -1.75646300 | -1.66774700 |
| H | 4.05751400  | 5.99035300  | 0.21235400  |
| H | -1.07792100 | 6.18396500  | 0.90860200  |
| H | -1.65128600 | 3.73006000  | 1.88800400  |
| H | -4.79416600 | -0.50274900 | 1.53301200  |
| H | -9.78592700 | -2.50654000 | -2.44474400 |
| H | -6.83235100 | -3.64623100 | 2.11690100  |
| H | -2.77454700 | -1.16272500 | 3.15197200  |
| H | 1.12922600  | -1.26827800 | 3.12347100  |

|   |            |             |             |
|---|------------|-------------|-------------|
| H | 4.58871800 | -8.23274700 | -0.77043300 |
| H | 8.10617800 | -6.09243000 | -2.01474400 |
| H | 3.81374300 | -1.23440100 | 1.85050600  |
| H | 3.21971000 | 3.62237700  | 1.33838500  |

---

Total energy: -4949.3079167 a.u.

BSSE corrected energy: -4949.3717066 a.u.

## 11. Guest 7@benzo[6]juril 2

| Atomic Symbol | Coordinates (Angstroms) |             |             |
|---------------|-------------------------|-------------|-------------|
|               | X                       | Y           | Z           |
| C             | 1.35184600              | 1.53509100  | 3.62071200  |
| C             | 2.11322700              | 0.22770400  | 1.64527400  |
| C             | 0.43534600              | -0.22756000 | -0.15379700 |
| C             | 3.11102600              | -0.53372700 | 1.01247200  |
| C             | 0.01098400              | 1.37282500  | 3.22614400  |
| C             | 0.74733800              | 0.26500700  | 1.12328700  |
| C             | -0.29471700             | 0.72248500  | 1.94961600  |
| C             | 2.41072700              | 0.85401500  | 2.87057400  |
| C             | 3.70937200              | 0.72183500  | 3.39642200  |
| C             | -1.61539300             | 0.56144900  | 1.50936200  |
| C             | 4.35925500              | -0.69366700 | 1.57253300  |
| C             | 4.66923900              | -0.04135400 | 2.76641000  |
| C             | -0.87162600             | -0.35220300 | -0.57574800 |
| C             | -1.90947900             | 0.01767600  | 0.27938100  |
| H             | 3.95700200              | 1.18288900  | 4.34312400  |
| H             | -2.43353200             | 0.84595400  | 2.15453100  |
| H             | 5.09046000              | -1.32521700 | 1.08374800  |
| H             | 5.65612700              | -0.13965400 | 3.20143400  |
| H             | -1.08689900             | -0.74192700 | -1.56513300 |
| H             | -2.94317200             | -0.12614500 | -0.00313500 |
| C             | 4.01689200              | -4.23120300 | -0.47908200 |
| C             | 2.64523900              | -4.01526500 | -0.39776500 |
| C             | 2.12218100              | -3.11377400 | -1.32361200 |
| C             | 2.92894400              | -2.43089300 | -2.21741900 |
| C             | 4.30846700              | -2.63479200 | -2.30112000 |
| C             | 4.82377800              | -3.61691600 | -1.46043700 |
| N             | 4.85792600              | -5.05364900 | 0.27744300  |
| C             | 6.12426100              | -5.04660300 | -0.27258300 |
| N             | 6.10952800              | -4.15258900 | -1.31724700 |
| O             | 7.06605500              | -5.74617100 | 0.06114500  |
| C             | 5.38335800              | 0.37942900  | -1.79165200 |
| C             | 4.92634600              | 1.65748400  | -1.40468600 |
| C             | 4.86093700              | -0.27781900 | -2.90273900 |
| C             | 3.95214200              | 0.45137000  | -3.67168000 |
| C             | 3.56167000              | 1.73496600  | -3.33271100 |
| C             | 4.01649300              | 2.37129500  | -2.17644300 |
| N             | 6.35175900              | 0.00857300  | -0.85562600 |
| C             | 6.47711400              | 0.99013900  | 0.10491700  |
| N             | 5.59444800              | 1.99162700  | -0.21994100 |
| O             | 7.25005200              | 0.94355800  | 1.04966500  |

|   |             |             |             |
|---|-------------|-------------|-------------|
| C | 3.59022200  | 3.78885200  | -1.90243900 |
| C | 1.64795500  | 5.29082800  | -1.30773200 |
| C | 2.12521700  | 4.01157100  | -1.58802300 |
| C | 1.16479400  | 3.00587700  | -1.61696900 |
| C | -0.19623900 | 3.27484500  | -1.50386100 |
| C | -0.68510400 | 4.56665800  | -1.32760900 |
| C | 0.28208400  | 5.55743100  | -1.15690600 |
| N | 2.32087000  | 6.51455300  | -1.15273600 |
| C | 1.40578600  | 7.51920200  | -0.87166200 |
| N | 0.15743500  | 6.92705400  | -0.88652400 |
| O | 1.65446200  | 8.68690500  | -0.64741100 |
| C | -2.16067400 | 4.90341000  | -1.41519000 |
| C | -3.66633200 | 3.08563200  | -0.47106300 |
| C | -3.10190200 | 3.73898600  | -1.55947400 |
| C | -3.52793800 | 3.30655300  | -2.81363900 |
| C | -4.48343500 | 2.30996200  | -2.96393000 |
| C | -5.08994300 | 1.68610900  | -1.87377300 |
| C | -4.65311600 | 2.10105100  | -0.61765400 |
| N | -3.46097900 | 3.26471900  | 0.90028700  |
| C | -4.30450400 | 2.43287200  | 1.60925800  |
| N | -5.02983700 | 1.71435000  | 0.67552700  |
| O | -4.37796200 | 2.33477500  | 2.82190000  |
| C | -6.14654500 | 0.63051100  | -2.08319900 |
| C | -6.48525100 | -1.81847700 | -1.37549400 |
| C | -5.65979800 | -0.77993300 | -1.80489600 |
| C | -4.31195000 | -1.10246500 | -1.94841000 |
| C | -3.79840100 | -2.33966700 | -1.58954600 |
| C | -4.60412700 | -3.35456900 | -1.08353800 |
| C | -5.96807800 | -3.08154100 | -1.04535200 |
| N | -7.86845300 | -1.87905600 | -1.15765100 |
| C | -8.23086600 | -3.16061000 | -0.78562800 |
| N | -7.04984700 | -3.88059000 | -0.65045800 |
| O | -9.35616100 | -3.58366100 | -0.62077900 |
| C | -1.99808200 | -3.83884500 | 0.80613500  |
| C | -2.53764800 | -4.57708700 | -0.24493700 |
| C | -1.62957300 | -5.30564900 | -1.01110200 |
| C | -0.27545100 | -5.32752300 | -0.72370600 |
| C | 0.27710900  | -4.60408700 | 0.33388000  |
| C | -0.61188600 | -3.82979000 | 1.07655200  |
| N | -2.59748200 | -3.05076900 | 1.79006400  |
| C | -1.63896500 | -2.59171300 | 2.65984100  |
| N | -0.42069400 | -3.00794700 | 2.19355500  |
| O | -1.87797100 | -1.94121900 | 3.67677200  |
| C | 1.75872600  | -4.75362200 | 0.58948100  |

|   |             |             |             |
|---|-------------|-------------|-------------|
| C | 4.54838500  | -5.95842500 | 1.36034700  |
| C | 7.24630800  | -4.22077900 | -2.23701200 |
| C | 7.35108100  | -1.04503200 | -0.84162100 |
| C | 5.31873300  | 3.06915800  | 0.72606200  |
| C | 3.73508300  | 6.80199400  | -1.10889000 |
| C | -1.01135500 | 7.69224600  | -0.50483400 |
| C | -2.43157400 | 4.02745700  | 1.57160500  |
| C | -6.06512800 | 0.79684500  | 1.09164200  |
| C | -8.88303500 | -0.86381000 | -1.37045200 |
| C | -7.10324800 | -5.32144700 | -0.50903300 |
| C | -3.98832400 | -2.74970400 | 2.11769000  |
| C | 0.82991900  | -2.74568800 | 2.92939400  |
| C | -4.00967500 | -4.64803400 | -0.56266000 |
| C | 5.10401200  | -1.73482100 | -3.23734600 |
| H | 1.05618900  | -2.92407500 | -1.32118500 |
| H | 2.47691700  | -1.68829500 | -2.86572900 |
| H | 3.53897200  | -0.01108600 | -4.56206300 |
| H | 2.86919400  | 2.26834400  | -3.97484200 |
| H | 3.82004500  | 4.36044300  | -2.81006600 |
| H | 4.18117400  | 4.23110200  | -1.10725000 |
| H | 1.47891500  | 1.98105700  | -1.76711900 |
| H | -0.89905900 | 2.45294300  | -1.58307100 |
| H | -2.29873400 | 5.57044100  | -2.27063600 |
| H | -2.47549200 | 5.48522100  | -0.55047600 |
| H | -3.11200400 | 3.78473600  | -3.69385700 |
| H | -4.79101400 | 2.01546100  | -3.96170300 |
| H | -6.51836700 | 0.68863900  | -3.10934500 |
| H | -6.99618700 | 0.86821800  | -1.44716200 |
| H | -3.63182700 | -0.33497600 | -2.29961700 |
| H | -2.73057900 | -2.50809700 | -1.65848800 |
| H | -2.00742800 | -5.89243000 | -1.84100300 |
| H | 0.38755200  | -5.93452700 | -1.33073700 |
| H | 2.00829300  | -4.45642800 | 1.60671600  |
| H | 1.99640600  | -5.82000400 | 0.53105800  |
| H | 3.88499900  | -5.46742300 | 2.06773100  |
| H | 5.50347500  | -6.17239800 | 1.84444100  |
| H | 7.02490100  | -3.61380200 | -3.10910700 |
| H | 8.11633400  | -3.81886400 | -1.70659500 |
| H | 8.33500400  | -0.57327600 | -0.94275100 |
| H | 7.18356800  | -1.69712800 | -1.68836600 |
| H | 5.59526200  | 4.03154700  | 0.29703600  |
| H | 5.96498500  | 2.85378600  | 1.58163700  |
| H | 3.80208000  | 7.89110700  | -1.05438300 |
| H | 4.22737000  | 6.45021600  | -2.01385500 |

|   |             |             |             |
|---|-------------|-------------|-------------|
| H | -1.60935500 | 7.11660600  | 0.19880700  |
| H | -0.62199100 | 8.58484000  | -0.00999400 |
| H | -1.49572100 | 3.93149900  | 1.02425600  |
| H | -2.31763500 | 3.58421500  | 2.56060400  |
| H | -5.90656300 | 0.63012000  | 2.15678200  |
| H | -5.95263100 | -0.14853500 | 0.57057800  |
| H | -8.64323400 | 0.02357500  | -0.78891600 |
| H | -9.80722200 | -1.30564400 | -0.99084200 |
| H | -6.45513200 | -5.65202600 | 0.29901700  |
| H | -8.14161500 | -5.54253800 | -0.25086500 |
| H | -4.21263300 | -3.23241600 | 3.07535500  |
| H | -4.63006400 | -3.15012600 | 1.34300500  |
| H | 1.05897000  | -3.64250100 | 3.52596800  |
| H | 1.61837100  | -2.58261500 | 2.19277900  |
| H | -4.18694400 | -5.44793400 | -1.28668200 |
| H | -4.54221100 | -4.95467600 | 0.34139100  |
| H | 4.77423100  | -1.90857300 | -4.26528600 |
| H | 6.16499100  | -1.96497300 | -3.22971600 |
| H | 2.89759400  | -1.05418600 | 0.08921000  |
| H | 1.23318700  | -0.51874000 | -0.82387500 |
| C | 1.63275900  | 2.29045500  | 4.77089000  |
| C | -1.00340000 | 1.88071300  | 4.05682900  |
| C | -0.70568700 | 2.58731100  | 5.20238200  |
| C | 0.62561000  | 2.81781000  | 5.54911200  |
| H | 0.86999200  | 3.39735300  | 6.43197600  |
| H | -1.50874900 | 2.96884600  | 5.82249800  |
| H | -2.04639700 | 1.73002100  | 3.80892400  |
| H | 2.65958800  | 2.47360200  | 5.05927800  |
| O | 4.40069600  | 6.17702700  | -0.04266900 |
| H | 3.93818000  | 6.37883500  | 0.77337600  |
| O | -1.83978600 | 8.01697000  | -1.58797700 |
| H | -1.37173900 | 8.65059400  | -2.13465700 |
| O | -2.71880600 | 5.40102500  | 1.65758000  |
| H | -3.45322000 | 5.51867900  | 2.26264600  |
| O | -7.36010700 | 1.27127700  | 0.81062000  |
| H | -7.53587500 | 2.03179800  | 1.36735800  |
| O | -8.98556100 | -0.47145900 | -2.71036900 |
| H | -9.35903600 | -1.20105100 | -3.20760800 |
| O | -6.67193000 | -6.00004900 | -1.65543300 |
| H | -7.31460500 | -5.85559100 | -2.35238700 |
| O | -4.22882900 | -1.38083100 | 2.18324400  |
| H | -3.69928000 | -1.04301700 | 2.91543500  |
| O | 0.76548700  | -1.61069200 | 3.70826200  |
| H | -0.10924700 | -1.56472900 | 4.12225200  |

|   |            |             |             |
|---|------------|-------------|-------------|
| O | 3.89781600 | -7.12640400 | 0.94201100  |
| H | 4.52415300 | -7.65562000 | 0.44402300  |
| O | 7.47586600 | -5.51062300 | -2.69853400 |
| H | 7.75644000 | -6.02423000 | -1.93267000 |
| O | 7.29355700 | -1.82281400 | 0.31271800  |
| H | 7.53802900 | -1.23367600 | 1.03650600  |
| O | 3.97292200 | 3.15992100  | 1.06115200  |
| H | 3.71622600 | 2.38411800  | 1.57076100  |

---

Total energy: -5026.7004102 a.u.

BSSE corrected energy: -5026.7688307 a.u.



## 12. Guest 8@benzo[6]juril 2

| Atomic Symbol | Coordinates (Angstroms) |             |             |
|---------------|-------------------------|-------------|-------------|
|               | X                       | Y           | Z           |
| C             | 0.52285200              | 1.66187300  | 4.09673000  |
| C             | 1.61302600              | 0.55541300  | 2.14782000  |
| C             | 0.29725300              | -0.02880200 | 0.15988400  |
| C             | 2.68631000              | -0.33940600 | 0.16304000  |
| C             | 2.74086600              | 0.15219800  | 1.47448000  |
| C             | 1.48449500              | -0.46082600 | -0.47549500 |
| C             | -0.68714600             | 1.78194300  | 3.35370600  |
| C             | 0.36824500              | 0.53892800  | 1.46072800  |
| C             | -0.80379700             | 1.09169100  | 2.05353300  |
| C             | 1.66159600              | 1.00628300  | 3.54760300  |
| C             | -1.71712200             | 2.53586800  | 3.87434300  |
| C             | 0.60550500              | 2.22872100  | 5.39590500  |
| C             | -1.61975500             | 3.12522400  | 5.14721300  |
| C             | -0.49475900             | 2.95824500  | 5.90551800  |
| C             | 2.78742000              | 0.85192100  | 4.32836500  |
| C             | 1.79255100              | 2.06663300  | 6.15069200  |
| C             | 2.85140700              | 1.37589300  | 5.63186100  |
| C             | -0.96128500             | -0.15067200 | -0.47117600 |
| C             | -2.00707400             | 0.95713300  | 1.39222300  |
| C             | -2.08650000             | 0.31223000  | 0.14619300  |
| H             | 3.60777700              | -0.63645000 | -0.31851600 |
| H             | 3.70135500              | 0.20649000  | 1.96057400  |
| H             | 1.42536000              | -0.87518200 | -1.47541000 |
| H             | -2.61367000             | 2.71054700  | 3.29461100  |
| H             | -2.45281700             | 3.70904300  | 5.52261600  |
| H             | -0.42025900             | 3.39524200  | 6.89594700  |
| H             | 3.63831800              | 0.30212600  | 3.95047600  |
| H             | 1.84368300              | 2.49710700  | 7.14536800  |
| H             | 3.75477000              | 1.23629700  | 6.21458800  |
| H             | -1.01925800             | -0.62690400 | -1.44460600 |
| H             | -2.91316200             | 1.34364100  | 1.83939000  |
| H             | -3.04734700             | 0.17249000  | -0.32814300 |
| C             | 5.66784600              | -2.80804500 | -1.17043300 |
| C             | 4.36239400              | -3.27915400 | -1.26874200 |
| C             | 3.53301700              | -2.59350300 | -2.15626900 |
| C             | 3.93540100              | -1.43123000 | -2.79170900 |
| C             | 5.21055300              | -0.89268200 | -2.61768200 |
| C             | 6.09511800              | -1.66645800 | -1.87744600 |
| N             | 6.75418100              | -3.22728500 | -0.39141100 |
| C             | 7.84426200              | -2.43816400 | -0.67832200 |

|   |             |             |             |
|---|-------------|-------------|-------------|
| N | 7.44338200  | -1.46317500 | -1.55905900 |
| O | 8.98991000  | -2.63505000 | -0.29264400 |
| C | 4.31470000  | 2.06907600  | -1.50715800 |
| C | 3.30738500  | 3.02027200  | -1.23140000 |
| C | 4.46627800  | 1.51985600  | -2.77948100 |
| C | 3.57670000  | 1.97700200  | -3.75324800 |
| C | 2.63875200  | 2.96352400  | -3.49658700 |
| C | 2.49732400  | 3.54117800  | -2.23550900 |
| N | 5.03050300  | 1.90440800  | -0.31627800 |
| C | 4.46383700  | 2.67966500  | 0.67677200  |
| N | 3.41053100  | 3.35320900  | 0.11814900  |
| O | 4.84671100  | 2.73510800  | 1.83705100  |
| C | 1.61482100  | 4.75487400  | -2.07248700 |
| C | -0.75366200 | 5.57413700  | -1.66179700 |
| C | 0.13430700  | 4.51555800  | -1.84994800 |
| C | -0.44474100 | 3.25307600  | -1.93745200 |
| C | -1.82349900 | 3.07352800  | -1.94995800 |
| C | -2.71921300 | 4.13778000  | -1.87115200 |
| C | -2.14266500 | 5.39242800  | -1.67927200 |
| N | -0.52283300 | 6.94579500  | -1.47273900 |
| C | -1.72956900 | 7.60575800  | -1.30739100 |
| N | -2.72091700 | 6.65888400  | -1.50769000 |
| O | -1.88922500 | 8.77721200  | -1.03329900 |
| C | -4.21326400 | 3.95251300  | -2.09072100 |
| C | -5.01877100 | 1.77887700  | -0.97613000 |
| C | -4.66558300 | 2.51532800  | -2.10452400 |
| C | -4.70154000 | 1.83288500  | -3.31861800 |
| C | -5.08052600 | 0.50345500  | -3.40895700 |
| C | -5.43966300 | -0.24066900 | -2.28725200 |
| C | -5.38103200 | 0.41924500  | -1.06191100 |
| N | -5.10034400 | 2.13618200  | 0.37138000  |
| C | -5.53924200 | 1.06137500  | 1.10618000  |
| N | -5.67339000 | -0.00764200 | 0.24051700  |
| O | -5.76244100 | 1.04496200  | 2.30934600  |
| C | -5.90342400 | -1.66491500 | -2.45490100 |
| C | -5.25638200 | -3.89741300 | -1.42628400 |
| C | -4.88661200 | -2.70590900 | -2.03400800 |
| C | -3.51865500 | -2.47038100 | -2.14060600 |
| C | -2.57748100 | -3.35075800 | -1.62583000 |
| C | -2.94456200 | -4.50277600 | -0.93488200 |
| C | -4.31099200 | -4.73857000 | -0.82945100 |
| N | -6.52462100 | -4.40194500 | -1.10209300 |
| C | -6.38249400 | -5.51820000 | -0.30752200 |
| N | -5.02569800 | -5.73323400 | -0.14567100 |

|   |             |             |             |
|---|-------------|-------------|-------------|
| O | -7.29094800 | -6.20448200 | 0.12916400  |
| C | 0.12487500  | -4.21858400 | 0.51952900  |
| C | -0.48303700 | -5.04853900 | -0.41925700 |
| C | 0.35472500  | -5.59358400 | -1.39035600 |
| C | 1.72254900  | -5.37652900 | -1.39191500 |
| C | 2.35467800  | -4.60746400 | -0.41564100 |
| C | 1.52245500  | -4.02470800 | 0.54057300  |
| N | -0.38934400 | -3.52583800 | 1.61453600  |
| C | 0.64066700  | -2.94888000 | 2.31911500  |
| N | 1.80963200  | -3.24113500 | 1.66301400  |
| O | 0.49494100  | -2.30283100 | 3.35411600  |
| C | 3.85763600  | -4.46815800 | -0.47182600 |
| C | 7.03747800  | -4.48478600 | 0.29234900  |
| C | 8.49891500  | -0.77838600 | -2.31458800 |
| C | 6.22730900  | 1.15783700  | 0.01416600  |
| C | 2.56656300  | 4.20822900  | 0.96803000  |
| C | 0.71855600  | 7.62658700  | -1.18549700 |
| C | -4.10795200 | 7.01511800  | -1.33686200 |
| C | -4.96776500 | 3.45733400  | 1.00602300  |
| C | -5.77378000 | -1.34903000 | 0.81163300  |
| C | -7.81682100 | -4.23731300 | -1.77648300 |
| C | -4.55250300 | -6.68270000 | 0.83138000  |
| C | -1.74162100 | -3.37256900 | 2.14710300  |
| C | 3.15114600  | -2.98304400 | 2.21259100  |
| C | -1.92759300 | -5.47225000 | -0.37045500 |
| C | 5.51038800  | 0.49163200  | -3.16521600 |
| O | 1.33224800  | 7.18003800  | -0.00613100 |
| O | -4.67446400 | 6.49535700  | -0.16268200 |
| O | -4.46577500 | 3.36202800  | 2.29538800  |
| O | -4.57243300 | -2.03985400 | 0.86059300  |
| O | -8.23174600 | -5.40076000 | -2.41119400 |
| O | -4.00236500 | -6.06675300 | 1.96795200  |
| O | -2.13995900 | -2.03798100 | 2.20077700  |
| O | 3.15153500  | -2.18076200 | 3.33931000  |
| O | 7.80737200  | -5.35086500 | -0.47994400 |
| O | 9.42193700  | -1.66058300 | -2.85684300 |
| O | 5.98816800  | 0.00437700  | 0.76647300  |
| O | 2.16017900  | 3.57024200  | 2.12427300  |
| H | 2.51661700  | -2.94160700 | -2.29066700 |
| H | 3.21509300  | -0.87875400 | -3.38498300 |
| H | 3.65711900  | 1.57100400  | -4.75604400 |
| H | 2.01564200  | 3.32927400  | -4.30599500 |
| H | 1.70711400  | 5.32903100  | -3.00153600 |
| H | 2.01676200  | 5.40078300  | -1.29115400 |

|   |             |             |             |
|---|-------------|-------------|-------------|
| H | 0.19717800  | 2.38425100  | -2.02675500 |
| H | -2.21035300 | 2.06867300  | -2.05097000 |
| H | -4.45863300 | 4.38107300  | -3.06864200 |
| H | -4.78503700 | 4.53065000  | -1.36503200 |
| H | -4.42505900 | 2.36913900  | -4.22006800 |
| H | -5.11437800 | 0.02409400  | -4.38124100 |
| H | -6.18306400 | -1.81072500 | -3.50347600 |
| H | -6.82272100 | -1.79238800 | -1.87984700 |
| H | -3.18135100 | -1.54834600 | -2.60077200 |
| H | -1.52325700 | -3.12203000 | -1.73060900 |
| H | -0.08068300 | -6.23902000 | -2.14551100 |
| H | 2.33371200  | -5.83920400 | -2.15943800 |
| H | 4.25913000  | -4.41876300 | 0.53747000  |
| H | 4.26471000  | -5.38721000 | -0.90738800 |
| H | 6.10614400  | -4.99185000 | 0.51146800  |
| H | 7.53826200  | -4.22303200 | 1.22832100  |
| H | 8.03740500  | -0.25728100 | -3.14774500 |
| H | 8.97380200  | -0.05571600 | -1.64048600 |
| H | 6.88457900  | 1.84148400  | 0.55782900  |
| H | 6.71415200  | 0.84679900  | -0.90112400 |
| H | 1.66648900  | 4.45621800  | 0.41530500  |
| H | 3.12679600  | 5.12725700  | 1.17655000  |
| H | 0.46628700  | 8.68859600  | -1.14839300 |
| H | 1.43719800  | 7.45185400  | -1.98345800 |
| H | -4.13568500 | 8.10650000  | -1.36093400 |
| H | -4.69902000 | 6.61796200  | -2.15974000 |
| H | -5.95042000 | 3.94637500  | 0.98860800  |
| H | -4.26501800 | 4.05198000  | 0.43258100  |
| H | -6.45218200 | -1.94918700 | 0.20930200  |
| H | -6.21358100 | -1.19148000 | 1.79934600  |
| H | -7.70769300 | -3.47952000 | -2.54537400 |
| H | -8.54348700 | -3.90239100 | -1.02807100 |
| H | -5.41463700 | -7.30811700 | 1.07405600  |
| H | -3.76279100 | -7.30076200 | 0.40977400  |
| H | -1.75314200 | -3.82751800 | 3.14241800  |
| H | -2.44595700 | -3.88590000 | 1.50278300  |
| H | 3.59344400  | -3.96049400 | 2.45407900  |
| H | 3.74047400  | -2.50088500 | 1.42454200  |
| H | -2.00523100 | -6.41012800 | -0.92992300 |
| H | -2.18805600 | -5.72099800 | 0.66138400  |
| H | 5.55496800  | 0.44981500  | -4.25754300 |
| H | 6.49056300  | 0.84304100  | -2.84726400 |
| H | 0.78434400  | 7.42638100  | 0.74187100  |
| H | -4.27186500 | 6.92855100  | 0.59292000  |

|   |             |             |             |
|---|-------------|-------------|-------------|
| H | -5.00743600 | 2.70700200  | 2.76164400  |
| H | -3.93350600 | -1.65542800 | 1.47822100  |
| H | -8.39954400 | -6.04861400 | -1.71770300 |
| H | -4.69244400 | -5.56442600 | 2.40669200  |
| H | -1.54374100 | -1.56130100 | 2.79044400  |
| H | 2.23867300  | -2.02677900 | 3.63754100  |
| H | 8.68781000  | -4.96734100 | -0.52938200 |
| H | 9.85805500  | -2.09011900 | -2.11152600 |
| H | 5.80943200  | 0.28383400  | 1.66778500  |
| H | 2.94606300  | 3.31884900  | 2.62392800  |

---

Total energy: -5102.8944816 a.u.

BSSE corrected energy: -5102.9612944 a.u.
